# 1 **A causal role for estradiol in human reinforcement learning**

2

## 3 **Authors**

4 Sebastijan Veselic<sup>1,2,3\*</sup>, Gerhard Jocham<sup>4</sup>, Christian Gausterer<sup>5</sup>, Bernhard Wagner<sup>6</sup>, Miriam  
5 Ernhoefer-Reßler<sup>6</sup>, Rupert Lanzenberger<sup>7</sup>, Claus Lamm<sup>1,8</sup>, Christoph Eisenegger<sup>1</sup> & Annabel  
6 Losecaat Vermeer<sup>1\*</sup>

7

## 8 **Affiliations**

9 <sup>1</sup> Neuropsychopharmacology and Biopsychology Unit, Department of Cognition, Emotion,  
10 and Methods in Psychology, Faculty of Psychology, University of Vienna, Austria

11 <sup>2</sup> Department of Clinical and Movement Neurosciences, University College London, London,  
12 UK

13 <sup>3</sup> Wellcome Centre for Human Neuroimaging, University College London, London, UK

14 <sup>4</sup> Biological Psychology of Decision Making, Institute of Experimental Psychology, Heinrich  
15 Heine University Düsseldorf, Germany

16 <sup>5</sup> FDZ-Forensisches DNA Zentrallabor GmbH, Medical University of Vienna, Austria

17 <sup>6</sup> Laboratory for Chromatographic & Spectrometric Analysis, FH JOANNEUM, Graz, Austria

18 <sup>7</sup> Department of Psychiatry and Psychotherapy, Medical University of Vienna, Vienna,  
19 Austria,

20 <sup>8</sup> Vienna Cognitive Science Hub, University of Vienna, Austria

21

22

23 (\*) corresponding authors: Sebastijan Veselic (*sebastijan.veselic.18@ucl.ac.uk*) and  
24 Annabel Losecaat Vermeer (*annabel.losecaat.vermeer@univie.ac.at*)

25 **Abstract**

26 The sex hormone estrogen is hypothesized to play a key role in human cognition via its  
27 interactions with the dopaminergic system. Work in rodents has shown that estrogen's most  
28 potent form, estradiol, impacts striatal dopamine functioning predominately via increased D1-  
29 receptor signalling and correlational evidence in humans has suggested high estradiol levels  
30 alter reward sensitivity. Here, we addressed two fundamental questions: 1) whether estradiol  
31 causally alters reward sensitivity in men, and 2) whether this effect of estradiol is moderated  
32 by individual variation in polymorphisms of dopaminergic genes. To test this, we performed a  
33 double-blind placebo-controlled administration study in which hundred men received either a  
34 single dose of estradiol (2 mg) or placebo. We found that estradiol administration increased  
35 reward sensitivity, which was moderated by baseline dopamine. This was observed in choice  
36 behaviour and increased learning rates. These results confirm a causal role of estradiol in  
37 reinforcement learning in men that is moderated by striatal and prefrontal dopaminergic  
38 pathways.

39

40 **Keywords:** *Estradiol, reward processing, reinforcement learning, DAT1, COMT, Estrogen*  
41 *receptor*

## 42 **Introduction**

43 Learning which actions to select based on whether the outcome of that action is rewarded or  
44 not is a fundamental capacity required for adaptive behaviour. One neuromodulator that has  
45 long been linked to this capacity, known as reinforcement learning (RL), is dopamine <sup>1</sup>. More  
46 recently, an additional biological substrate that has been suggested to influence RL via  
47 dopaminergic mechanisms is the steroid hormone estrogen <sup>2</sup>.

48 Estrogens are a class of steroid hormones important for healthy development in  
49 mammals, with estradiol being the most prevalent and potent form <sup>3,4</sup>. Previous human studies  
50 implicated estradiol in several cognitive processes with mixed findings in terms of its exact  
51 role (for reviews see <sup>2,5</sup>). One recent hypothesis has been that estradiol may specifically impact  
52 human reward processing by amplifying dopamine signalling via one of its receptors (i.e. the  
53 D1 receptor) <sup>2</sup>. For example, human neuroimaging work has revealed that fluctuations in  
54 estradiol levels are correlated with increased reward sensitivity, as documented by an  
55 increased BOLD response in the midbrain <sup>6-8</sup>. Similarly, rodent literature has shown that  
56 manipulation of estradiol levels affect the striatal dopamine system in various ways, with a net  
57 increase in overall dopamine signalling predominantly via the D1 receptor <sup>9-14</sup>. Besides the  
58 observed role of estradiol in the striatal dopamine system, it has a hypothesised connection  
59 to dopamine in the prefrontal cortex as well. Namely, estradiol metabolites decrease the  
60 activity of Catechol-O-methyltransferase (COMT), an enzyme responsible for approximately  
61 60 percent of dopamine degradation in the prefrontal cortex and approximately 15 percent in  
62 the striatum <sup>2,15</sup>. Correspondingly, one correlational study previously observed that the  
63 association between endogenous estradiol levels and working memory performance is  
64 moderated by polymorphisms of the COMT gene <sup>16</sup>.

65 Dopamine's role in reward processing and learning has been well studied using RL  
66 tasks and has been formalized with the reward prediction error hypothesis <sup>1,17-19</sup>. A canonical  
67 approach to investigate the causal role of dopamine in reward processing is to employ a  
68 double-blind placebo-controlled administration protocol using dopamine agonists and

69 antagonists, respectively <sup>20–26</sup>. Extending this approach through pharmacogenetics, which is  
70 the interaction between administered drugs and genetic variation, has enabled a better  
71 understanding of how genetic variation modulates dopamine availability and how the latter  
72 influences reward processing and cognition more generally <sup>16,21,24,27,28</sup>.

73 This line of work has shown that causal manipulation of dopamine levels in humans  
74 affects performance in reinforcement learning <sup>28</sup>, and that these effects can depend on  
75 individual differences in baseline dopamine levels <sup>20</sup>. Crucially, such individual differences  
76 arise from polymorphisms of dopamine-related genes impacting dopamine synthesis capacity  
77 and transmission <sup>16,21,26</sup>. For example, the COMT and dopamine transporter (DAT1) gene have  
78 polymorphisms that correlate with differences in performance on working memory and  
79 reinforcement learning tasks <sup>16,21,26,29,30</sup>. These polymorphisms are the val<sup>158</sup>met polymorphism  
80 of COMT (i.e. the Val/Val, Met/Val, and Met/Met genotypes that are each associated with  
81 increasingly higher levels of prefrontal dopamine) and VNTR polymorphism of DAT1 (i.e. the  
82 9/10 and 10/10 genotypes are associated with high and low striatal dopamine, respectively).

83 Despite abundant evidence from rodent research and work in humans showing the  
84 relation between estradiol, dopamine, and human cognition, results so far have been  
85 contradictory in terms of estradiol's effects. Namely, it has been shown that high endogenous  
86 estradiol levels increased <sup>6,8</sup> as well as decreased <sup>31</sup> performance on a variety of cognitive  
87 tasks. Although previous work on humans provided important insights, these were mostly  
88 based on correlations (for exceptions see <sup>6,31,32</sup>), small sample sizes (for exception see <sup>32</sup>),  
89 and additionally did not explicitly focus on the importance of baseline differences in dopamine  
90 (for exceptions see <sup>16,33</sup>). Therefore, the precise role of estradiol in human reward processing  
91 remains unclear (for review see <sup>2</sup>).

92 The aim of the present study was to investigate whether estradiol causally affects  
93 reward processing in a probabilistic RL task by employing a pharmacogenetic approach (Fig.  
94 1A). The task required subjects to choose between two options on each trial in order to  
95 maximize their earnings. The probability of reward of both options was determined by two  
96 independent random Gaussian walks while the reward size was constant across trials (Fig.

97 1B). A constant reward size allowed us to isolate estradiol's influence on choice behaviour as  
98 a function of receiving versus not receiving a reward on each trial. This allowed for a more  
99 precise examination how estradiol influences reward processing. We further investigated  
100 whether an effect on reward sensitivity was moderated by individuals' baseline dopamine, as  
101 indexed through genetic variation in COMT and DAT1. Our main hypothesis was that estradiol  
102 administration would increase reward sensitivity which would be observed through increased  
103 choice reactivity. We further predicted that an increase in reward sensitivity would be observed  
104 in increased Q-learning learning rates, indicative of higher learning. Finally, we predicted that  
105 the behavioural and computational effects would uniquely depend on polymorphisms of both  
106 COMT and DAT1, as observed in previous work <sup>21,27</sup>.

107 To detect differences at the level of individual genetic variants, we used a sample size  
108 ( $N = 100$ ) in line with previous recommendations in the field <sup>2</sup>. Our sample was pre-screened  
109 and matched for key physiological characteristics, behavioural and cognitive traits and states  
110 that could have impacted RL behaviour (see Supplementary Materials). Moreover, we aimed  
111 at providing a more conclusive and precise account of a dopamine-dependent basis of action  
112 through excluding several other mechanistic explanations, which have so far been  
113 unaddressed. These included polymorphisms of androgen and estrogen receptors, together  
114 with a polymorphism influencing the enzyme aromatase that is responsible for the conversion  
115 of androgens to estradiol. These mechanisms are important because previous work has  
116 shown that administering estradiol also increases free circulating androgen levels, which are  
117 known to be converted to estradiol through aromatase <sup>34</sup> (see also Supplementary Materials).

118 In brief, we have found that estradiol administration increased reward sensitivity as  
119 compared to placebo administration. This was observed in choice behaviour and increased  
120 learning rates. Furthermore, we observed that the interaction between estradiol administration  
121 and dopamine-related genes predicted choice, in line with predictions from previous work  
122 reviewed here. Finally, we have observed several effects related to staying and switching  
123 behaviour that depended not only on striatal but also prefrontal baseline dopamine levels.  
124 Taken together, the described effects are consistent with the hypothesis that estradiol acts by

125 amplifying dopamine signalling via the D1 receptor and extend this by showing that the effects  
126 of estradiol are moderated by differences in prefrontal dopaminergic functioning as well.

127

## 128 **Results**

129 Both treatment groups (estradiol and placebo) were matched on several key characteristics.  
130 These included age, height, visceral, and abdominal fat, BMI, and individual traits and states  
131 that can impact RL behaviour, including working memory, self-reported impulsivity,  
132 behavioural inhibition and approach, and mood. As a manipulation check of our administration  
133 protocol, estradiol concentrations were significantly elevated in subjects who had received  
134 estradiol compared to placebo after ( $W = 1545$ , 95% CI [0.03, 1.87],  $p < .05$ ), but not before  
135 administration (baseline:  $W = 1498$ , 95% CI [-0.05, 1.03],  $p = .09$ ) and subjects' beliefs about  
136 whether they had received estradiol or placebo did not correlate with the actual received drug  
137 ( $r = 0.02$ ,  $p = .82$ ; for further details on group characteristics, matching, and manipulation  
138 checks see Supplementary Materials).

139 First, we investigated our hypothesis that estradiol administration would alter reward  
140 sensitivity, which we expected to observe through a systematic difference in choice behaviour  
141 across trials compared to placebo. We quantified this systematic difference by computing the  
142 cumulative difference in the probability of choosing option A across trials in both groups. This  
143 cumulative difference was then compared to a null distribution demonstrating what would be  
144 expected by chance (see Methods and materials). Similarly, we looked at the percentage of  
145 trials on which estradiol caused a significant difference in the chosen option compared to  
146 placebo. Moreover, we looked at whether these differences in choice behaviour also reflected  
147 improved task performance. Secondly, we tested our hypothesis that the effect of estradiol  
148 administration on choice behaviour would interact with genetic variation of COMT and DAT1.  
149 This was followed by a more detailed examination of whether these interactive effects would  
150 be observed in the amount of switching and staying behaviour, and choice autocorrelation  
151 throughout the task. Finally, we formalized these differences in behaviour within a

152 reinforcement learning framework that allowed us to exclude the possibility that choice  
 153 differences were due to more stochastic responding, but instead were due to higher learning  
 154 rates, indicative of higher weighing of more recent relative to old task-relevant information.

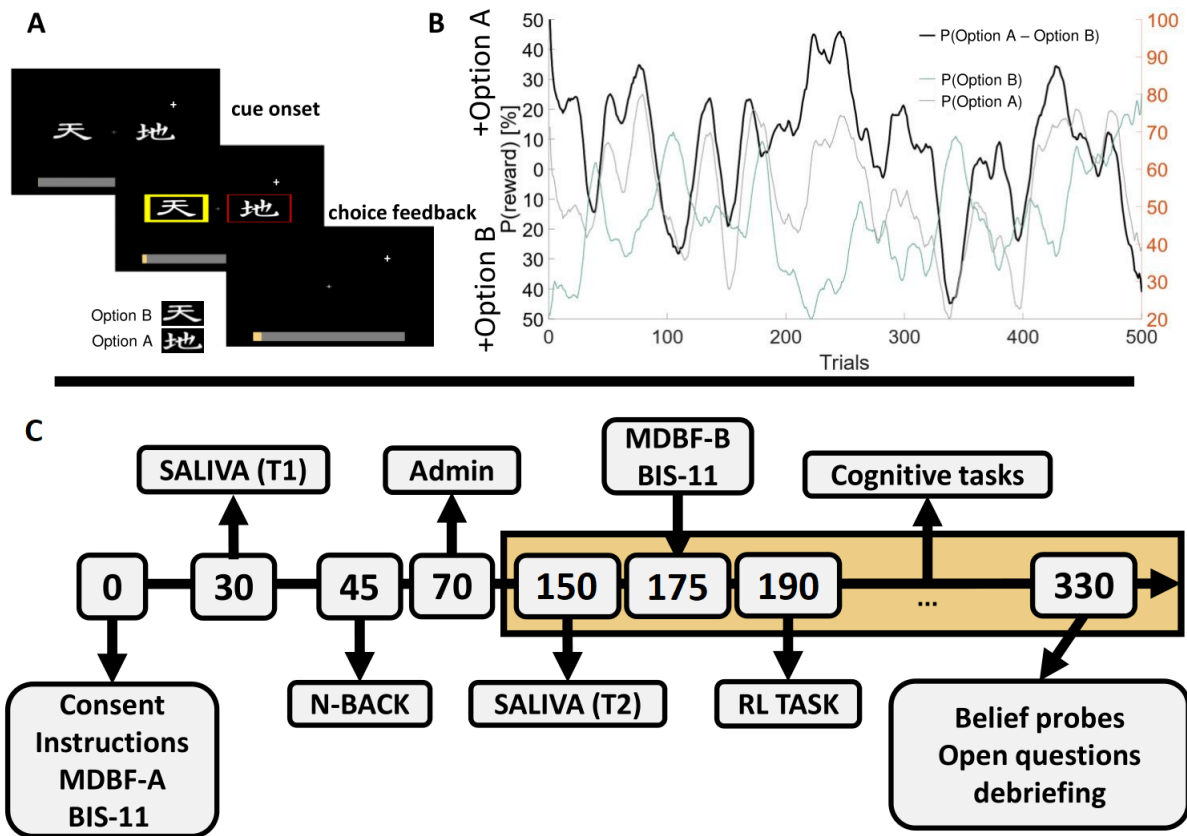

155

156 **Fig. 1 A)** Outline of a trial of the RL task. Each trial started by the presentation of two options (henceforth  
 157 option A and option B). Subjects were required to choose one of these options. After they made a  
 158 choice, subjects were presented with feedback, with the chosen option indicated by a thicker frame and  
 159 the not chosen option by a thinner frame. A yellow frame indicated the rewarded option, whereas a red  
 160 frame indicated the unrewarded option. Importantly, both options A and B could yield a reward or no  
 161 reward on the same trial. **B)** The probability of reward upon choice for each option (green and gray  
 162 lines), which were determined by two independent random Gaussian walks, with the probability shown  
 163 in percent on the right y-axis in orange. The black line shows the relative probability of reward for one  
 164 option over the other, which corresponds to the difference in reward probability for option A and option  
 165 B. On trials where the black line is reaching the top half of the y-axis, option A was more rewarding, and  
 166 vice versa. **C)** The timeline of the test session. Values in brackets denote minutes from the onset of the  
 167 test session. We first collected consent and questionnaire data, which was followed by a baseline saliva  
 168 sample (T1) and the N-BACK task. After administration of estradiol or placebo, subjects were required  
 169 to rest for two hours before we collected the second saliva sample (T2) and assessed subjects' mood  
 170 and impulsivity via questionnaires. The RL task began 120 minutes post-administration. This was  
 171 followed by three other cognitive tasks that are not the focus of the current paper. At the end of the test  
 172 session, we probed subjects' beliefs about the drug, the experiment, and debriefed them.

173

174 **Estradiol administration alters choice reactivity**

175 Our first hypothesis was that estradiol administration would increase reward sensitivity. By  
176 reward sensitivity, we refer to a systematic difference in the chosen option across trials  
177 between the estradiol and the placebo group. Since reward sizes were constant, the only  
178 difference across trials was whether a reward was received or not following choice. An effect  
179 of estradiol on reward sensitivity would therefore be observed if the difference between the  
180 option that each group chose on average across trials would be higher than would be expected  
181 by chance. We investigated whether such a difference in choice behaviour exists in two  
182 complementary ways. We first computed the probability for each group to select option A vs.  
183 option B across trials, subtracted the two group traces from each other (Fig. 2A) and plotted  
184 the cumulative choice difference across trials (Fig. 2B).

185 Under the hypothesis that estradiol systematically influenced choice behaviour, the  
186 cumulative difference in the expected chosen option should have exceeded the one obtained  
187 from a null distribution. Specifically, in the null distribution choice behaviour was decoupled  
188 from the actual treatment (i.e. estradiol vs. placebo) and revealed what degree of cumulative  
189 choice difference would be expected by chance or random assignment of treatment (see  
190 Methods and materials). Indeed, we observed that the cumulative difference in the expected  
191 chosen option between the estradiol and placebo group started to exceed the 100<sup>th</sup> percentile  
192 of a null distribution (Fig. 2B) ( $M_{\text{last trial}} = 53.48\%$ ,  $z_{\text{last trial}} = 8.44$ ,  $p < .001$ , threshold value for  
193 99.9<sup>th</sup> percentile of null distribution: 46.20 %). This cumulative choice difference between the  
194 estradiol and placebo group remained significant when we collapsed it across time (Fig. 2C),  
195 which is demonstrated as the mean and the standard error of the mean remaining above the  
196 99.9<sup>th</sup> percentile threshold of a null distribution ( $M = 25.72 \pm 0.69\%$ ,  $z = 5.80$ ,  $p < .001$ , threshold  
197 value for 99.9<sup>th</sup> percentile of null distribution:  $M = 21.02\%$ ) (see Methods and materials). Both  
198 results showed that estradiol administration (vs. placebo) led to systematic differences in  
199 subjects' choice.

200 Secondly, we tested the percentage of trials on which there was a statistically  
201 significant difference between the groups in choice behaviour. To test this, we performed a



202 two-sample proportion z-test on each trial, where we statistically compared the proportion of  
203 subjects choosing option A between both groups. We observed that estradiol administration  
204 (vs. placebo) led to a statistically significant difference in the proportion of subjects choosing  
205 option A vs. option B on 7.6 % of trials (black dots in Fig. 2A). In other words, estradiol  
206 administration caused subjects to choose a different option on 7.6 % of trials as compared to  
207 placebo. We performed family-wise error control similarly to above (see Methods and  
208 materials). For this, we decoupled the responses from the treatment and tested whether this  
209 percentage would have been obtained in a null distribution with random allocation of groups.  
210 This comparison showed that the change in how groups responded to the rewarding options  
211 on 7.6 % of trials exceeded the threshold value of a null distribution ( $z = 5.37$ ,  $p < .001$ ,  
212 threshold value for 99.9<sup>th</sup> percentile of null distribution: 6.4 %).

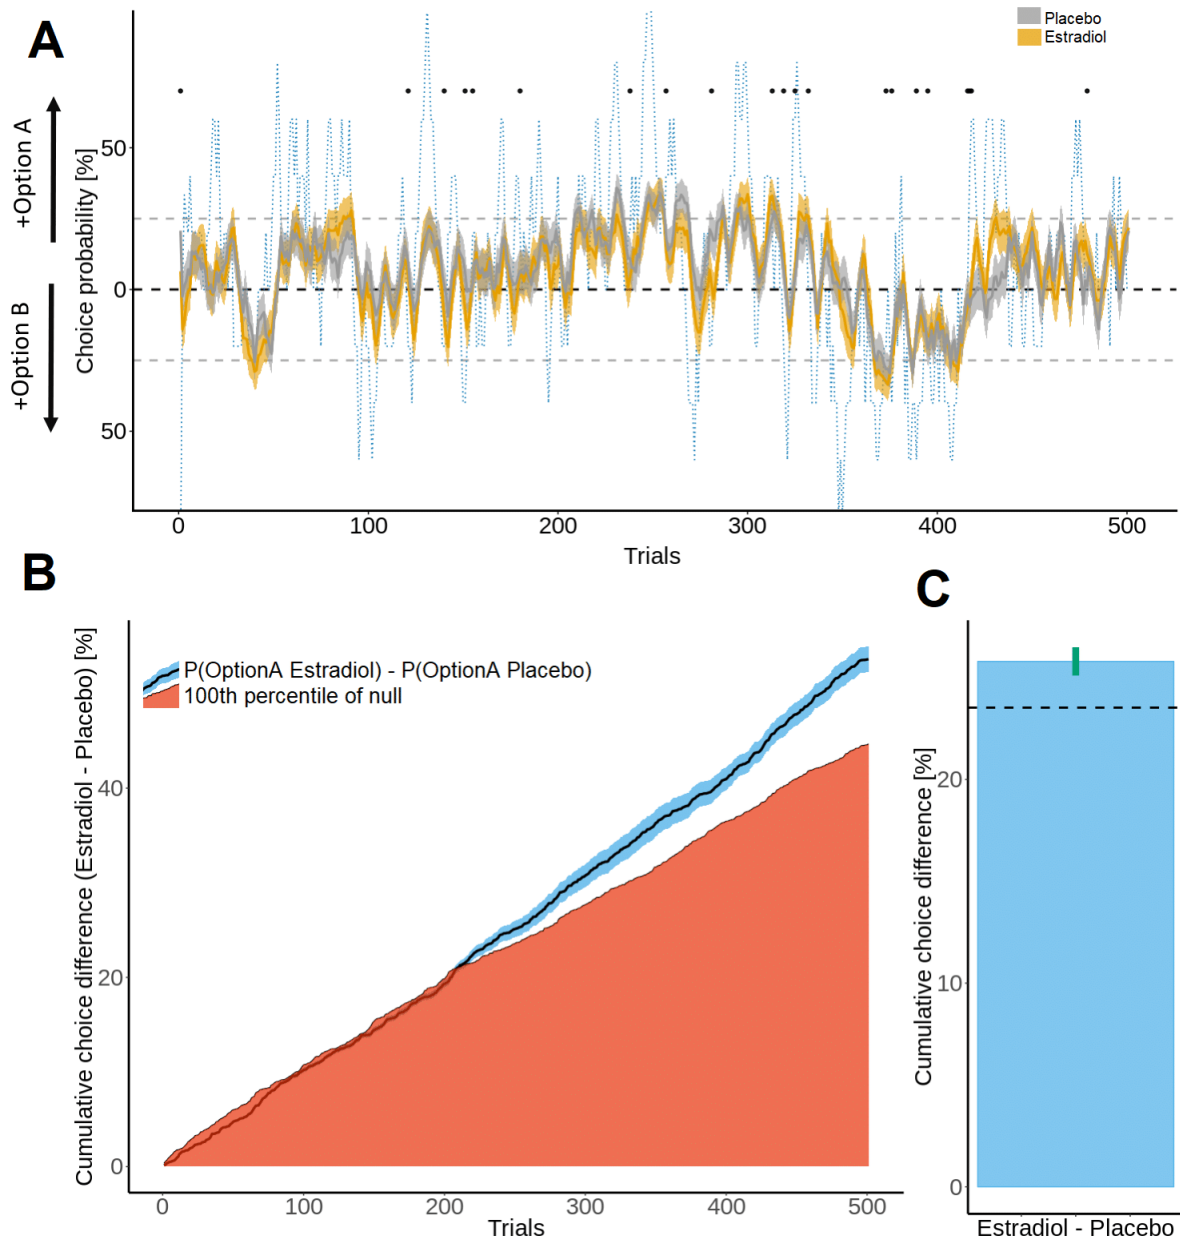

213

214 **Fig. 2 A**) Relative choice probability for choosing option A (top of y-axis) vs. choosing option B (bottom  
 215 of y-axis) for the estradiol (orange) and placebo (gray) group. Solid thick lines represent trial mean,  
 216 shaded areas around the thick lines denote standard errors of the mean. The blue dotted line denotes  
 217 the relative reward probability which was computed from the probability of option A (top of y-axis) minus  
 218 probability of option B (bottom of y-axis). Horizontal gray dotted lines represent where subjects were on  
 219 average 25% more likely to select option A (upper line) or option B (lower line). All time-series traces  
 220 were smoothed with a 5-trial moving average for visual purposes. The black dots indicate trials where  
 221 there was a statistically significant difference ( $p < .05$ ) between the estradiol and placebo group. The  
 222 number of significant trials was compared to a null distribution (see Methods and materials). **B**)  
 223 Cumulative choice difference between the estradiol and placebo group over trials compared to a 100<sup>th</sup>  
 224 percentile null distribution. The thick black line is the difference between the orange and gray lines  
 225 presented in figure **A**, and the blue shaded area is the corresponding difference between the standard  
 226 errors in **A**. The dark orange area denotes the space in which differences are not significant.  
 227 Conversely, separation between the lines indicate statistical significance. **C**) Mean cumulative choice  
 228 difference between the estradiol and placebo group collapsed across trials. The dashed line represents  
 229 the mean cumulative choice difference of the 100<sup>th</sup> percentile of the null distribution. Error bars indicate  
 230 standard error of the mean.

231

## 232 **DAT1 genotype marginally moderates the effects of estradiol on accuracy**

233 Following the observed systematic choice difference between both groups, we investigated  
234 whether this was reflected in group differences in accuracy (i.e. whether the estradiol group  
235 chose the option with higher probability of reward compared to the placebo group). In a  
236 comparison of choice accuracy (Fig. 3A), we observed that subjects with exogenously  
237 elevated estradiol were not more accurate compared to subjects with placebo ( $M_{Estradiol} = 57.30$   
238  $\pm 6.91$ ,  $M_{Placebo} = 56.80 \pm 7.09$ ,  $t_{(97.94)} = 0.36$ , 95% CI [-3.28, 2.28],  $p = .72$ ,  $d = 0.07$ ), and  
239 responded equally fast ( $M_{Estradiol} = 0.61$  sec  $\pm 0.11$ ,  $M_{Placebo} = 0.62$  sec  $\pm 0.09$ ,  $t_{(95.55)} = 0.46$ ,  $p$   
240  $= .65$ ,  $d = 0.09$ ).

241 However, based on previous work that showed interactive effects between cognitive  
242 performance and dopamine-related genes<sup>20,35</sup>, we had hypothesized that the effect of  
243 estradiol on accuracy may depend on individual differences in baseline striatal dopamine  
244 (indexed with DAT1 polymorphism: 9/10 and 10/10 genotypes are associated with high and  
245 low striatal dopamine, respectively). Similarly, we predicted that the effects of estradiol may  
246 depend on differences in prefrontal dopamine (indexed with the COMT polymorphism, as  
247 Met/Met, Met/Val, and Val/Val genotypes are associated with high, medium, and low prefrontal  
248 dopamine, respectively). A general linear model revealed a trend towards an interaction  
249 between drug administration and DAT1 genotype on accuracy ( $F_{(1, 69)} = 3.69$ ,  $p = .06$ ,  $\Omega^2 =$   
250  $0.03$ , Fig. 3B), while controlling for covariates (see Methods and materials). Following up this  
251 trend, pairwise comparisons revealed that estradiol administration increased accuracy in  
252 subjects with the 9/10 genotype (i.e. high striatal dopamine levels;  $M = 60.00 \pm 5.36$ ) compared  
253 to those with a 10/10 genotype (i.e. low striatal dopamine levels; 10/10 DAT1,  $M = 56.00 \pm 6.51$ ;  
254  $t_{(39.60)} = 2.14$ , 95% CI [0.21, 7.63],  $p = .04$ ,  $d = 0.61$ ), but not for the placebo group (9/10  
255 genotype:  $M = 57.21 \pm 6.60$ ; 10/10 genotype:  $M = 56.75 \pm 6.34$ ;  $t_{(31.02)} = 0.22$ , 95% CI [-3.74,  
256 4.66],  $p = .82$ ,  $d = 0.06$ ). Subjects with the 9/10 genotype in the estradiol group were not more

257 accurate compared to subjects with the 9/10 genotype in the placebo group ( $t_{(29.04)} = 1.33$ , 95%  
258 *CI* [-1.48, 7.00],  $p = .19$ ,  $d = 0.45$ ) nor when comparing the groups with the 10/10 genotype  
259  $t_{(40.22)} = 1.82$ , 95% *CI* [-0.36, 6.80],  $p = .08$ ,  $d = 0.61$ ).

260 Repeating the same analysis for the COMT genotype revealed no interaction between  
261 drug administration and COMT on accuracy ( $F_{(2, 79)} = 1.76$ ,  $p = .18$ ,  $\Omega^2 = 0.02$ , Fig. 3C).

262 In sum, estradiol administration increased reward sensitivity. We observed this in terms  
263 of a cumulative difference in the expected chosen option between the estradiol and the  
264 placebo group, both across trials and collapsed across trials. Furthermore, on a subset of trials  
265 we found a significant difference in the proportion of subjects from the estradiol group  
266 compared to placebo group who chose option A. This systematic difference in how subjects  
267 responded throughout the task was not reflected in increased accuracy across both groups.  
268 However, in line with our hypothesis we found a significant interaction between genetic  
269 variation of DAT1 polymorphism and drug administration, such that in the estradiol group  
270 subjects with a 9/10 DAT1 genotype showed an improved accuracy (by trend) relative to those  
271 with a 10/10 DAT1 genotype, with no such difference in the placebo group. No such interaction  
272 was observed for the COMT polymorphism, indicating that estradiol mainly acted on striatal  
273 rather than prefrontal dopamine signaling in terms of its effects on task accuracy.

274

275

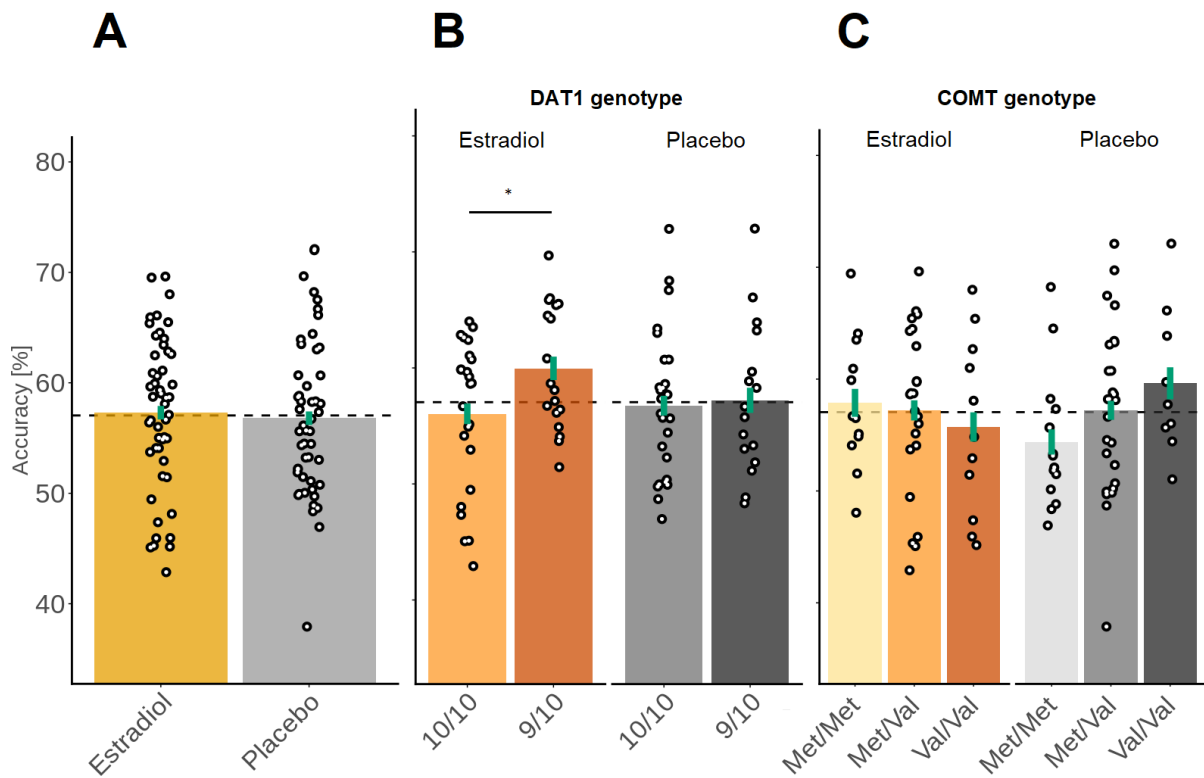

276

277 **Fig. 3 A)** Mean accuracy split according to drug administration. **B)** Mean accuracy split according to  
278 drug administration and DAT1 polymorphism. **C)** Mean accuracy split according to drug administration  
279 and COMT polymorphism. Green error bars are standard errors of the mean. Dots represent individual  
280 subjects. The horizontal black dotted line represents grand mean performance collapsed across groups  
281 to show the relative change for individual subgroups. \*  $p < .05$ .

282

### 283 **The effect of estradiol administration on choice behaviour is moderated by** 284 **polymorphisms of both COMT and DAT1**

285 To directly test whether the effect of estradiol administration on choice behaviour is moderated  
286 by polymorphisms of dopamine-related genes (e.g. COMT, DAT1), and whether individual  
287 variability in these effects may be a contributing factor to the observed effects, we used  
288 generalized linear mixed models. We tested whether the interaction between drug,  
289 polymorphism (COMT or DAT1), and trial are a significant predictor of choice behaviour (i.e.  
290 reward sensitivity).

291 We predicted a significant interaction due to the observed differences in cumulative  
292 choice behaviour described above. Based on the inverted U-shape dopamine hypothesis<sup>35</sup>,  
293 we predicted that estradiol administration would upregulate reward sensitivity in subjects with

294 low prefrontal dopaminergic activity (i.e. Val/Val) but would not, or would even impair it, in  
295 those with high prefrontal dopaminergic activity (i.e. Met/Met). The model predicted that  
296 exogenously elevated estradiol in subjects with a Met/Val ( $\beta = 0.20 \pm 0.04$ , 95% CI [0.11, 0.28],  
297  $z = 4.56$ ,  $p < .001$ ) and Val/Val genotype ( $\beta = 0.37 \pm 0.06$ , 95% CI [0.26, 0.48],  $z = 6.99$ ,  $p <$   
298  $.001$ ) were more likely to select option A as trials progressed (Fig. 1B, see also Fig. S2 and  
299 Fig. S7. Supplementary Materials) – which was the more rewarding option throughout the task  
300 (percent trials rewarded:  $M_{\text{optionA}} = 53.70\%$ ,  $M_{\text{optionB}} = 42.91\%$ ).

301 Similarly, we predicted that estradiol should indirectly increase striatal dopamine  
302 levels, leading to higher reward prediction errors. Based on this, we expected that subjects  
303 with the 9/10 genotype (i.e. high striatal dopamine) would select the more rewarding option  
304 (i.e. higher value option) more often and less so for subjects with the 10/10 genotype (i.e. low  
305 striatal dopamine). This was supported by model predictions showing that that subjects with  
306 the 10/10 genotype with placebo ( $\beta = -0.12 \pm 0.04$ , 95% CI [-0.04, -0.20],  $z = -3.03$ ,  $p < .01$ )  
307 were the most likely to select the lower valued option A throughout task progression, while  
308 estradiol administration dampened this slope in subjects with the same 10/10 genotype (see  
309 Fig. S7. Supplementary Materials). Results from both generalized linear mixed effects models  
310 showed that once individual variation was considered, the effect of estradiol administration on  
311 choice behaviour across trials was moderated by striatal (DAT1) and prefrontal (COMT)  
312 polymorphisms (see Fig. S7. Supplementary Materials for model predictions).

313

### 314 **Increased reward sensitivity is observed in increased learning rates**

315 Given our observation that estradiol increased reward sensitivity and our hypothesis that the  
316 mechanistic explanation for a cumulative choice difference in this task may underlie increased  
317 striatal and prefrontal dopamine levels, we predicted that estradiol would enhance the learning  
318 of reward probabilities. In a RL framework this would be reflected in increased learning rates.  
319 The learning rates represent latent variables dictating one's weighing of recent in comparison

320 to older information. To test this, we estimated the learning rate by fitting several Q-learning  
 321 models (see Methods and materials). To test this, we estimated learning rates by fitting several  
 322 Q-learning models (see Methods and materials). The best model (model 2, leave one out  
 323 information criterion (LOOIC) = 60179, Fig. 4A) included separate learning rates for each  
 324 option, a temperature parameter, and an irreducible noise parameter. The model predicted  
 325 choice behaviour above chance ( $t_{(99)} = 13.95$ , 95% CI [0.64, 0.68],  $p < .001$ , Fig. 4B, see also  
 326 Fig. S8. Supplementary Materials) and did not perform better for either group ( $M_{\text{Estradiol}} = 66.26$   
 327 %  $\pm 10.77$ ,  $M_{\text{Placebo}} = 64.90$  %  $\pm 11.85$ ;  $t_{(97.115)} = 0.76$ , 95% CI [-0.03, 0.06],  $p = .45$ ).

328 Our main hypothesis was that if estradiol increases available striatal and prefrontal  
 329 dopamine concentrations <sup>2,5</sup>, then the behavioural differences in choice over time (Fig. 2A)  
 330 would be captured in the learning rates. We have found that estradiol administration increased  
 331 the learning rate for both options compared to placebo ( $\alpha_{\text{optionB}}$ :  $M_{\text{Estradiol}} = 0.27 \pm 0.16$ ,  $M_{\text{Placebo}}$   
 332 =  $0.17 \pm 0.13$ ,  $t_{(85.36)} = 4.47$ , 95% CI [0.08, 0.21],  $p < .001$ ,  $d = 0.9$ ;  $\alpha_{\text{optionA}}$ :  $M_{\text{Estradiol}} = 0.26 \pm 0.19$ ,  
 333  $M_{\text{Placebo}} = 0.12 \pm 0.13$ ,  $t_{(92.13)} = 3.42$ , 95% CI [0.04, 0.16],  $p < .001$ ,  $d = 0.69$ , Fig. 4C). We  
 334 expected that estradiol would affect both learning rates in the same direction due to their  
 335 intrinsic correlation arising from the fact that both capture the same behaviour ( $r = 0.84$ ,  $p$   
 336  $< .001$ ). However, contrary to our expectations, the observed main effect of estradiol was not  
 337 moderated by either polymorphisms of DAT1 or COMT (COMT:  $\alpha_{\text{optionB}}$ :  $F_{(2, 81)} = 0.37$ ,  $p = .69$ ;  
 338  $\alpha_{\text{optionA}}$ :  $F_{(2, 72)} = 0.29$ ,  $p = .75$ ; DAT1:  $\alpha_{\text{optionB}}$ :  $F_{(1, 71)} = 0.02$ ,  $p = .89$ ,  $\alpha_{\text{optionA}}$ :  $F_{(1, 71)} = 0.03$ ,  $p =$   
 339  $.86$ ).

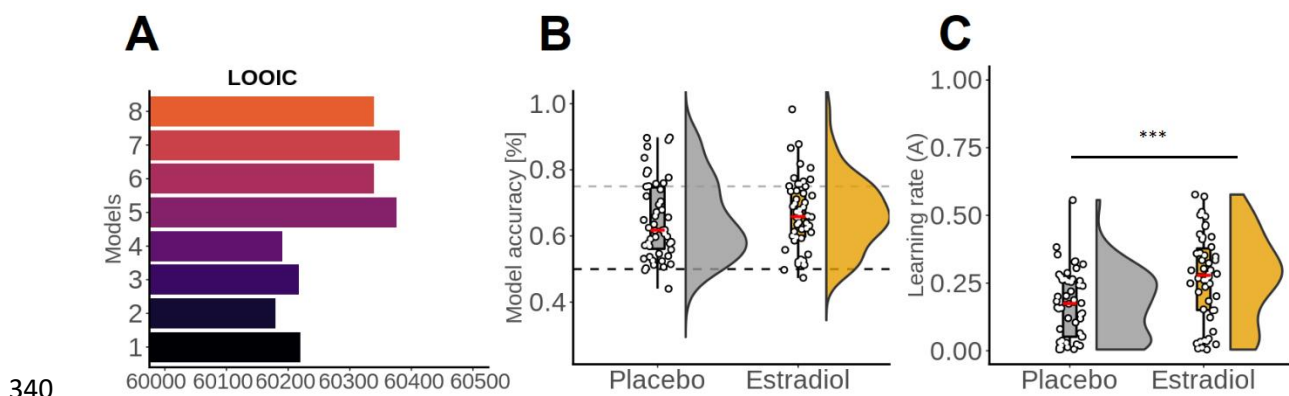

341 **Fig. 4 A)** Leave one out information criterion (LOOIC) value for all employed models. Lower LOOIC  
342 indicates better model fit – model two was selected as the best model. **B)** The overall model accuracy  
343 collapsed over time obtained from the posterior predictive density (see Supplementary Materials) shown  
344 for both groups separately. Individual dots represent subjects. The red bar represents the median, the  
345 box plot represents the 75% middle most data points, with the whiskers representing  $1.95 \times \text{IQR}$ . **C)**  
346 Learning rates by drug treatment. The estradiol group (in orange) had higher learning rates compared  
347 to the placebo group (in gray).

348

349 In sum, the estradiol group had higher learning rates compared to the placebo group  
350 but we observed no moderation of the polymorphisms of both COMT and DAT1 on the model  
351 parameters.

352

353 **Altered reward sensitivity is driven by differences in the number of stay-switch**  
354 **decisions and moderated by COMT and DAT1 genotype.**

355 Finally, to more precisely understand the observed difference in choice behaviour between  
356 treatment groups and dopamine-related genes, we tested whether this difference could be  
357 attributed to differences in staying and switching behaviour, commonly studied in this field<sup>26,36</sup>.

358 Based on our expectation that estradiol would increase striatal dopamine levels, and  
359 through that increase reward prediction errors, we predicted that estradiol administration  
360 would enhance staying behaviour moderated by DAT1, but not by COMT polymorphism. As a  
361 measure of staying, we computed how many trials subjects chose the same option on average  
362 if they were previously rewarded for that option (see Fig. 5). Overall, estradiol administration  
363 did not increase the number of stay choices ( $M = 1.70 \pm 0.03$ ) compared to placebo ( $M = 1.65$   
364  $\pm 0.04$ ;  $t_{(97.91)} = 1.07$ , 95% CI [-0.15, 0.04],  $p = .29$ ,  $d = 0.21$ ).

365 However, estradiol administration in 9/10 DAT1 genotype subjects, who were more  
366 accurate compared to subjects who received estradiol and had the 10/10 genotype, also chose  
367 the same option on more trials on average after being rewarded for their choice ( $M = 1.79 \pm$   
368  $0.18$ ; Fig. 5B). This was observed compared to subjects with placebo who had the 9/10  
369 genotype ( $M = 1.63 \pm 0.22$ ;  $t_{(29.05)} = 2.33$ , 95% CI [0.02, 0.3],  $p = .03$ ,  $d = 0.41$ ; see also  
370 Supplementary Materials Fig. S6), and compared to subjects who had the 10/10 genotype



371 (placebo:  $t_{(41.61)} = 2.22$ , 95% CI [0.01, 0.27],  $p = .03$ ,  $d = 0.41$ ; estradiol: ( $t_{(38..86)} = 2.49$ , 95% CI  
372 [0.03, 0.27],  $p = .02$ ,  $d = 0.64$ ). In other words, the increase in accuracy by exogenously  
373 elevated estradiol in individuals with a 9/10 genotype was reflected in increased staying with  
374 options for which they were previously rewarded. This is consistent with previous work  
375 showing increased striatal prediction errors following dopamine precursor administration <sup>28</sup>.

376 Furthermore, because estradiol administration likely results in increased prefrontal  
377 dopamine levels through downregulating COMT enzyme activity, we predicted that the  
378 interaction between estradiol administration and COMT polymorphism would be predictive of  
379 switching behaviour <sup>26</sup>. As a measure of switching, we assessed the number of times the  
380 option chosen on trial  $t$  was different from the one chosen at trial  $t + 1$  (i.e. a switch),  
381 irrespective of the choice outcome on trial  $t$  (see Fig. 5). Estradiol administration did not  
382 significantly influence switch decisions ( $M = 162.12 \pm 56.31$ ) compared to placebo ( $M = 168.82$   
383  $\pm 68.13$ ;  $t_{(94.64)} = 0.54$ , 95% CI [-18.12, 31.51],  $p = .59$ ,  $d = 0.11$ ). However, we observed a  
384 significant interaction of estradiol administration by COMT genotype ( $F_{(2, 80)} = 3.22$ ,  $p = .05$ ,  $\Omega^2$   
385 = 0.04, Fig. 5A). The interaction showed that subjects with placebo and a Val/Val genotype  
386 (i.e. low prefrontal dopamine availability) switched less often ( $\beta = -84.07 \pm 33.69$ ,  $p = .02$ )  
387 compared to all other groups. As predicted by the inverted U-shaped relationship between  
388 prefrontal dopamine levels and behaviour <sup>35</sup>, Val/Val placebo subjects (Val/Val:  $M = 132.33$   
389  $\pm 61.40$ ) switched less compared to Met/Met placebo subjects (i.e. associated with high  
390 prefrontal dopamine availability; Met/Met:  $M = 204.27 \pm 53.52$ ,  $t_{(15.10)} = 2.91$ , 95% CI [19.25,  
391 124.54],  $p = .01$ ,  $d = 1.46$ ). For the estradiol group, this difference was not present (Val/Val:  $M$   
392 = 151.09  $\pm 70.85$ ; Met/Met:  $M = 178.5 \pm 55.34$ ;  $t_{(18.96)} = 1.03$ , 95% CI [-28.28, 83.10],  $p = .32$ ,  $d$   
393 = 0.44). That is, estradiol administration attenuated naturally occurring differences in switching  
394 behaviour found in subjects with the Met/Met and Val/Val genotypes that are associated with  
395 high and low prefrontal dopamine levels, respectively.

396 Crucially, the effects reported for accuracy, staying, and switching were not explained  
397 by other mechanistic explanations (i.e. other genetic polymorphisms assessed here), such as

398 those related to androgen receptor functioning, androgen to estrogen conversion, or estrogen  
399 receptor functioning (see Supplementary Materials), indicating that the observed results are  
400 moderated specifically by dopamine-related genes. Furthermore, in Supplementary Materials  
401 we further show that the observed differences in staying and switching can be also  
402 characterised as differences in choice autocorrelation, and choice autocorrelation as a  
403 function of previous reward. In brief, the estradiol group overall exhibited less choice  
404 autocorrelation compared to the placebo group, showing that previous responses had a  
405 weakened effect on future choices, with these differences being more pronounced based on  
406 DAT and COMT polymorphisms.

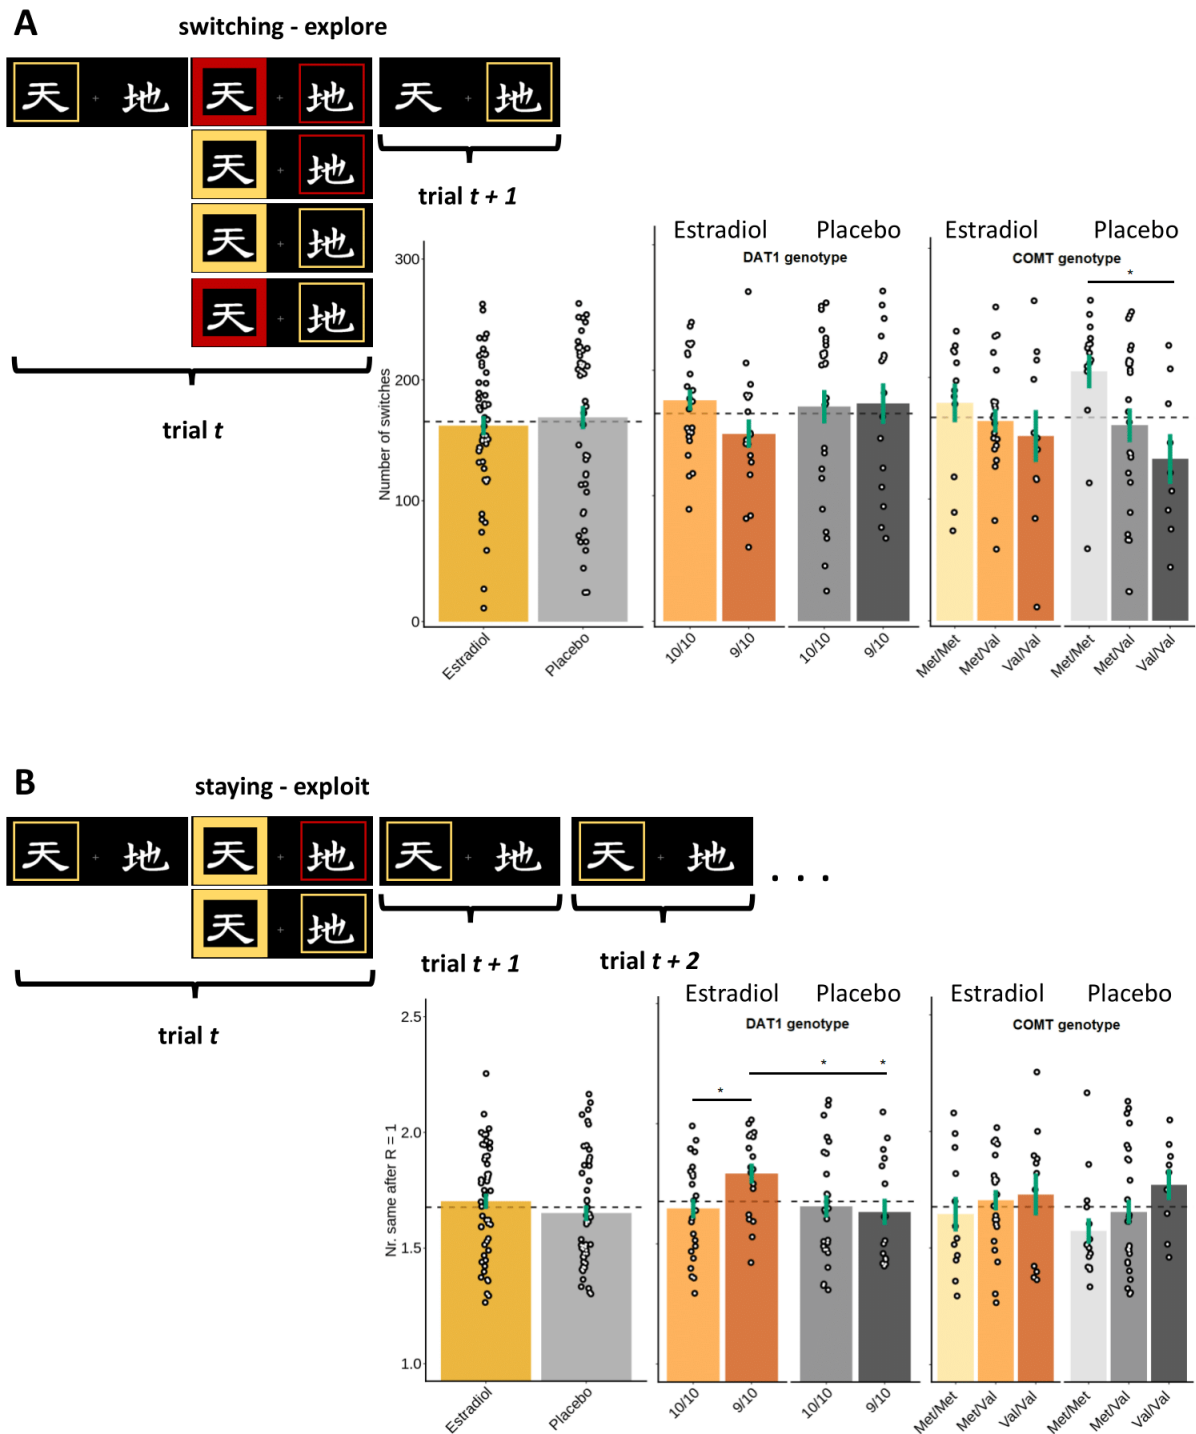

407

408 **Fig. 5** Stay and switch behaviour split according to drug administration and the COMT and DAT1  
 409 polymorphisms. **A)** Switching behaviour, measured as the total number of trials on which subjects chose  
 410 different options on trial  $t$  and trial  $t + 1$ , independent of the choice outcome on trial  $t$ . **B)** Staying  
 411 behaviour, measured as the average number of trials the same option was selected when that choice  
 412 was previously rewarded. In both plots, each dot represents a subject, the green error bar represents  
 413 standard error of the mean.

414

415

416

## 417 **Discussion**

418 In this study we examined the causal effects of estradiol on reward processing in human  
419 males. A body of previous rodent causal and human correlational work has suggested a role  
420 of estradiol in cognition, and reward processing more specifically, via dopamine-related  
421 mechanisms<sup>5,7,8,10,12,14,16,37</sup>. However, it remained an open question whether the effect of  
422 estradiol administration would be observable in choice behaviour of healthy young men and  
423 whether this would be moderated by individual variation in DAT1 and COMT. By employing a  
424 pharmacogenetic approach with a probabilistic RL task, we have shown that exogenously  
425 elevated estradiol altered various aspects of choice behaviour related to reward processing.  
426 Moreover, we have shown that effects related to accuracy, staying, and switching were  
427 moderated by striatal (DAT1) and prefrontal (COMT) dopamine-related genes, but not by other  
428 candidate genes that we tested.

429 Firstly, we confirmed the hypothesis that estradiol administration increases reward  
430 sensitivity in healthy young men as observed through increased choice reactivity. More  
431 specifically, we found that the cumulative difference in the expected chosen option between  
432 both groups was higher than what would be expected by chance. This was the case when we  
433 compared choice behaviour across trials and when we collapsed across trials. When we  
434 further quantified the difference by looking at the percentage of trials on which the estradiol  
435 group choose a different option compared to the placebo group, we observed they chose  
436 differently on a statistically significant subset of trials that was above chance.

437 In addition to these analyses, we aimed to account for individual variability in the  
438 strength of a potential effect on choice behaviour<sup>38,39</sup>. Using two separate generalized linear  
439 mixed models, we observed that both models predicted choice, showing that the effect of  
440 estradiol on choice behaviour over time was moderated by baseline striatal (DAT1 – first  
441 model) and prefrontal dopamine levels (COMT – second model). Overall, these results  
442 replicate previous correlational<sup>7,8</sup> neuroimaging work and preliminary evidence from a

443 pharmacological study on a small sample of women at menopause ( $N = 13$ ) showing changes  
444 in BOLD signal due to reward-related information in conditions of high vs. low estradiol  
445 conditions<sup>6</sup>. Furthermore, our results show, for the first time, that causal exogenous alteration  
446 of estradiol leads to differences in choice behaviour on a reinforcement learning task via  
447 striatal and prefrontal modulation.

448         However, these differences in choice behaviour alone would not yet clearly establish  
449 whether estradiol acted by amplifying dopamine D1 receptor signalling<sup>2</sup>. To test this more  
450 directly, we investigated whether the observed choice differences resulted in differences in  
451 accuracy on our task, as expected by previous work using dopamine precursor administration  
452 <sup>28</sup>. We also tested whether this would be moderated by the DAT1 polymorphism <sup>27,33</sup>. This  
453 revealed a trending interaction ( $p = .06$ ) between estradiol administration and the DAT1  
454 polymorphism on accuracy. Specifically, a pairwise comparison showed that estradiol  
455 administration significantly increased accuracy in subjects with the 9/10 genotype (i.e. high  
456 striatal dopamine), but only compared to subjects with the 10/10 genotype. This effect had a  
457 medium effect size (Cohen's  $d = 0.61$ ).

458         While the observed effect on accuracy is in line with our hypothesis and predictions of  
459 estradiol amplifying striatal dopamine D1 receptor signalling<sup>2</sup>, our findings should be  
460 considered as preliminary and warrant replication in future pharmacogenetic administration  
461 studies using larger samples per cell. Of note is that previous research, in which striatal  
462 dopamine levels were increased exogenously, showed a deterioration in accuracy in their  
463 experimental group with the 9/10 genotype, but an improvement in those with the 10/10  
464 genotype <sup>27</sup>. One possible explanation for this contrast with our results is that our administered  
465 estradiol dosage most likely acted akin to a “low dosage” of a dopamine precursor. Namely,  
466 dopamine precursor administration has been previously shown to impact behaviour in a dose-  
467 dependent manner <sup>40,41</sup>. This interpretation is also supported by a recent administration study  
468 on a small sample of women ( $N = 34$ ) where 12 mg of estradiol (i.e. 6 times our dose)  
469 decreased working memory performance<sup>31</sup>, which was interpreted as an overstimulation of

470 dopaminergic transmission. Similar support comes from a study on hippocampal activity in  
471 women following dose-dependent estradiol administration<sup>32</sup>.

472 Overall, our finding of a subtle effect on accuracy following estradiol administration  
473 when including the genetic DAT1 polymorphism converges with previous work. That is,  
474 previous work has interpreted diverging results in the direction of increased and decreased  
475 performance in high estradiol conditions due to different baseline dopamine levels<sup>8,37,42,43</sup>. Our  
476 results provide empirical evidence for these previous claims by showing that the effect of  
477 estradiol on reward processing is better understood when taking baseline dopamine levels  
478 into account. Furthermore, they show that investigating whether and how chronic estradiol  
479 administration alters reward processing in humans, dependent on one's genotype, may yield  
480 important and novel insights for both basic science as well as clinical practice.

481 To better understand what drove the effect on accuracy and choice reactivity, we  
482 computed metrics of switching and staying behaviour that are commonly investigated in such  
483 tasks<sup>26,36</sup> and performed choice autocorrelation analyses. Both metrics showed that within the  
484 estradiol group, the subtle difference in accuracy between the DAT1 polymorphisms was  
485 reflected by increased staying behaviour. Namely, subjects with a 9/10 genotype chose the  
486 same option on more trials, on average, if they were previously rewarded for that choice,  
487 compared to the other subgroups. In addition to finding a weak effect through mechanisms of  
488 striatal dopamine, we have observed that the interaction between drug administration and  
489 COMT predicted switching behaviour. Specifically, estradiol administration attenuated  
490 naturally occurring differences in switching observed in the placebo group. While Val/Val  
491 placebo subjects switched least and significantly less compared to Met/Met placebo subjects,  
492 this difference disappeared in the estradiol group. The switching and staying effects depending  
493 on both the COMT and DAT1 polymorphisms were also supported by analyses of choice  
494 autocorrelation, and revealed a comparable pattern to the one described, but also enabled us  
495 to better understand the effect of choices several trials ago on the current choice.

496 Finding an effect on switching that is moderated by individual variation in COMT  
497 provides, for the first time, evidence for the hypothesis that estradiol has a causal role in frontal  
498 dopamine-mediaton<sup>16</sup>. This likely happens due to the inhibition of COMT activity through  
499 estradiol metabolites that leads to increased dopamine availability<sup>5,13</sup>. This means that  
500 estradiol does not interact only with striatal dopamine levels but also with frontal dopamine  
501 levels. Our effect establishes a set of causal findings for future work to replicate and build  
502 upon.

503 Finally, because we predicted that increased reward sensitivity would occur due to  
504 larger striatal reward prediction errors because of estradiol administration, we hypothesised  
505 that this would be reflected in increased learning rates, as compared to placebo. This  
506 demonstrates that estradiol increased the weight of new information relative to old information.  
507 These effects are consistent with predictions by previous imaging work who found increased  
508 reward sensitivity in high estradiol conditions<sup>6</sup>. This is furthermore supported by decreased  
509 choice autocorrelation in subjects who were administered with estradiol compared to placebo.  
510 However, the effect of estradiol on learning rates was not moderated by the COMT or DAT1  
511 polymorphism, in contrast to our predictions. Similarly to our interpretation for accuracy and  
512 staying behaviour reported below, it is likely that our sample size was not sufficiently large to  
513 detect difference at the polymorphism subgroup level. To the best of our knowledge, this is  
514 the first examination of behavioural differences through computational modelling as a function  
515 of estradiol administration and polymorphisms of dopamine genes in men. The results provide  
516 grounding for future work that may benefit by incorporating a computational approach to  
517 elucidate the observable behavioural changes following estradiol administration. Framing  
518 behavioural effects through a computational framework would allow future work to compare  
519 their findings with our work and findings about other hormones, e.g. testosterone<sup>44,45</sup>.

520 Through the behavioural and genetic measures we collected, we were also able to  
521 exclude a substantial number of other candidate mechanisms that could have driven some of  
522 the effects we observed. These include androgen receptor functioning (polyglutamine (CAG)

523 and polyglycine (GGN) repeats), differences in androgen to estrogen conversion (CYP 19A1)  
524 or estrogen receptor functioning (ER $\alpha$ , ER $\beta$ ), which have been previously unaddressed (see  
525 Supplementary Materials). Furthermore, we were able to exclude confounding measures that  
526 are known to influence estradiol metabolism upon administration such as changes in self-  
527 reported mood and attention due to drug administration, individual differences in  
528 impulsiveness, behavioural approach and inhibition, working memory performance assessed  
529 via an N-back task, salivary cortisol levels, and differences in body measurements (weight,  
530 height, BMI, abdominal and visceral fat) (see Supplementary Materials).

531 The current study also encountered some limitations. Based on these, we provide  
532 recommendations for future work employing pharmacogenetics with estradiol.

533 The first is related to increasing sample size. While our sample size was approximately  
534 twice as large compared to most previous work <sup>8,16,31,33,37,43,46,47</sup>, for one exception see <sup>32</sup>) and  
535 in line with suggestions for the field <sup>2</sup>, we suspect that we were underpowered to detect all  
536 effects of interest at COMT and DAT1 polymorphism level. The reason for this is that we  
537 observed several “trend-level” p-values ( $p < 0.1$ ) for which we had strong theoretical  
538 predictions. Specifically, this refers to not finding a clear interaction between estradiol  
539 administration with both DAT1 and COMT on accuracy <sup>27,33</sup>. In addition, we would have  
540 predicted an interaction between estradiol administration with DAT1 on staying, because of  
541 increased accuracy. The interaction with COMT on switching behaviour similarly needs  
542 replication. Moreover, because previous administration studies did not compute behavioural  
543 effect sizes that could have served as a basis for our current work, except of the general  
544 recommendation in <sup>2</sup>, it was difficult to estimate the minimal viable sample size. Due to general  
545 power issues in this field of research, larger sample sizes are required and starting to be used  
546 also in other psychoneuroendocrinological work <sup>44,45</sup>.

547 The second recommendation relates to the type of reinforcement learning task used.  
548 For future research we would suggest using a reversal learning task <sup>20,48</sup> with parametrically  
549 changing reward probability contingencies. Based on our findings, we predict that such a task



550 could elucidate more clearly the effect of estradiol on behaviour. Namely, the trials where we  
551 observed the clearest effect (e.g. trials around 400) is where the largest probability reversals  
552 happened. If our prediction is true, it should also more clearly show improved learning and  
553 accuracy compared to the Gaussian random walks employed here. An alternative idea for  
554 future work is to use the two-step task<sup>49</sup> which would enable to further disentangle both model-  
555 free and model-based behaviour and reveal how variation in COMT and DAT1 moderates the  
556 influence of administration. We would predict estradiol to have similar effects as found by other  
557 work using dopamine precursors where administration increased model-based learning<sup>50</sup>.

558 Our third recommendation is related to dose-dependent effects of estradiol  
559 administration. In<sup>31</sup>, the authors concluded they may have elicited overstimulation (12 mg) of  
560 dopaminergic transmission, while our results (2 mg) show similarity to a low dose of a  
561 dopamine precursor due to contrasting results with<sup>27</sup>. An extension through a dose-dependent  
562 investigation of choice behaviour would show whether this is true for reward processing  
563 similarly to dose-dependent observations in<sup>40,41</sup> and further contribute to the understanding of  
564 estradiol in relation to the inverted U-shape hypothesis<sup>35</sup>.

565 The final recommendation is to include additional genotypes that may moderate the  
566 influence of estradiol on behaviour (e.g. the Taq1A variant in the dopamine D2 receptor gene).  
567 This would enable to better disentangle the contribution of different dopamine-related genes  
568<sup>21,24</sup>. Alternatively, neurochemical positron emission tomography as in<sup>20</sup> with estradiol  
569 administration would provide a better understanding at the level of receptor binding and show  
570 to which degree these effects relate to dopaminergic circuitry in prefrontal and striatal regions.

571 In conclusion, we have shown that estradiol causally influences choice behaviour by  
572 altering reward processing. The observed effects were specifically moderated by frontal  
573 (COMT) and striatal (DAT) dopamine-related genes but not estrogen and androgen-related  
574 genes (CAG, GGN, CYP 19A1, ER $\alpha$ , ER $\beta$ ). Our results converge with experimental evidence  
575 from rodent work that showed amplified striatal dopamine D1 signalling in high estradiol  
576 conditions. Moreover, they confirm the prediction that estradiol has a role in frontal dopamine

577 signalling through the COMT polymorphism<sup>5,13,16</sup>. Finally, our behavioural results were  
578 supported by computational modelling showing that estradiol causally increased learning  
579 rates, supporting the hypothesis that increased reward prediction errors may have driven the  
580 increased reward sensitivity

581 In sum, our study shows the importance of using more complex research designs that  
582 are supported by causal work from animal models and correlational human studies. Combining  
583 predictions from both and augmenting the hypotheses with pharmacogenetics allows us to  
584 elucidate the interactions between hormones, neurotransmitter systems, and cognition, both  
585 on a mechanistic, behavioural, and computational level. Such an approach has important  
586 implications for a better understanding of the biology and neuroscience of human cognition  
587 that is moderated by genes in both health and disorder.

588

## 589 **Acknowledgements**

590 The authors would like to thank Christina Faschinger and Isa Krol for their assistance in data  
591 collection, Nace Mikus for his help in data collection and analysis suggestions, and Lei Zhang  
592 for comments on the final manuscript. The study was supported by the Vienna Science and  
593 Technology Fund (WWTF VRG13-007).

## 594 **Conflict of interests**

595 The authors declare no potential conflicts of interest with respect to the research, authorship,  
596 and/or publication of this article. RL received travel grants and/or conference speaker  
597 honoraria within the last three years from Shire, Heel, Bruker, and support from Siemens  
598 Healthcare regarding clinical research using PET/MR. He is a shareholder of BM Health  
599 GmbH since 2019.

600

## 601 **Methods and materials**

### 602 **Subjects**

603 One hundred healthy young males between 19 and 34 years ( $M_{age} = 24.86$ ,  $SD = 3.53$ )  
604 participated in the study. We only included men in this study as the employed administration  
605 procedure was previously validated on a sample of health young men. Therefore, these results  
606 are only representative for the male population and need replication in women as well. All  
607 subjects had a body mass index (BMI) between 19.3 and 31.5 ( $M = 24.45$ ,  $SD = 2.86$ ). We  
608 screened potential subjects for the presence or a history of psychiatric disorders, self-reported  
609 weight and height, concurrent involvement in other studies with pharmacological agents, and  
610 presence of a chronic physical injury that might have prevented them from participation in a  
611 longer experiment. The short version of e-MINI<sup>51</sup> was used to screen and exclude those who  
612 had a non-diagnosed, disclosed, or a diagnosed psychiatric disorder. The screening  
613 procedure and the sample size estimate were based on previous work for which we obtained  
614 pharmacokinetic data for a single 2 mg estradiol dose in topical form<sup>34</sup>. Subjects were  
615 recruited through social media, web portals, and flyers on university premises. All subjects  
616 provided written informed consent and were financially compensated for the completion of the  
617 experiment (50€) and received an additional maximum bonus of 40€ (range 7€ – 30€) based  
618 on their performance in the all the tasks. The procedure described was performed in  
619 accordance with the Declaration of Helsinki and approved by the Medical Ethics Committee  
620 of the University of Vienna (1918/2015).

621

### 622 **Measurement Instruments**

#### 623 **Questionnaires**

624 We used a battery of questionnaires to assess self-reported mood (German Multidimensional  
625 Mood State Questionnaire;<sup>52</sup>, individuals' impulsiveness (Barratt Impulsiveness Scale, BIS-

626 11; <sup>53</sup>), and reward responsiveness (BIS/BAS; <sup>54</sup>), to test for changes after estradiol  
627 administration and ensure there were no interindividual differences between both groups, as  
628 previously both BIS/BAS and BIS-11 scores have been found to correlate with reward learning  
629 <sup>55–58</sup> (see Supplementary Materials). In addition, we probed subjects' beliefs and confidence  
630 about estradiol (e.g. whether they believed they received estradiol or a placebo, how certain  
631 they were of this answer, and whether they noticed any changes). This was done to later  
632 regress out the potential contribution of beliefs arising, for example, from subjects researching  
633 potential side effects of the hormone prior the experiment. Namely, individuals' beliefs about  
634 having received the hormone and beliefs about the effects of the hormone on their  
635 performance have previously shown to modulate behaviour independent of whether subjects  
636 had received the hormone <sup>59</sup>.

637

### 638 **Hormone concentrations**

639 We collected hormone samples via passive drool and stored them at -30 degrees Celsius.  
640 Saliva samples were analyzed for estrone and estradiol using gas chromatography tandem  
641 mass spectrometry (GC-MS/MS) and hydrocortisone including testosterone with liquid  
642 chromatography tandem mass spectrometry (LCMS/MS) (see Supplementary Materials for  
643 details of procedure).

644

### 645 **Genotyping**

646 We collected DNA using sterile cotton buccal swabs (Sarstedt AG, Germany) and extracted it  
647 by applying the QIAamp DNA Mini kit (Qiagen, Germany). Repeat length polymorphisms  
648 (AR(CAG), AR(GGN), DAT1(VNTR), ER $\alpha$ (TA) and ER $\beta$ (CA)) were investigated by PCR with  
649 fluorescent-dye-labeled primers and capillary electrophoresis. The single base primer  
650 extension (SBE) method also known as minisequencing was applied for the typing of single

651 nucleotide polymorphism (SNP) variants (Val158Met) in the COMT gene (see Supplementary  
652 Materials for details of procedure).

653

## 654 **Experimental Tasks**

655 For each task, we gave subjects paper instructions including control questions to check  
656 whether all subjects understood the instructions. All tasks except for the N-BACK task were  
657 monetarily incentivised.

658 **Working memory capacity:** We assessed working memory capacity using an adapted  
659 version of the standard N-BACK task<sup>16</sup>. In our version we added a 1-BACK condition, creating  
660 four conditions in total (i.e. a 0-BACK, 1-BACK, 2- BACK, 3-BACK). One condition block had  
661 20 trials which included 20% target, 65% nontarget, and 15% lure trials. Subjects were  
662 presented with a sequence of letters one-by-one. For each letter, they had to decide if the current  
663 letter was the same as the one presented *N* trials ago by pressing “R”, in case it was not the  
664 same they had to press “O”. For example, in the 3-back condition, the letter sequence “**A B D A**  
665 **A**” would require subjects to press “R” only to the second occurrence of A, as this was the same  
666 letter as the one 3 trials ago. The last A in this example sequence is defined as a lure trial, while  
667 the other letters were nontarget trials. Lure trials were present only in the 2-BACK and 3-BACK  
668 conditions as in<sup>16</sup>, and while lure trials were added to keep the task consistent with their  
669 implementation, we did not further analyse them separately as they were not relevant for our  
670 question. In total, there were four blocks per condition. Each block was announced by an  
671 instruction lasting for 2 sec (Fig. 1A), a fixation cross (1 sec) and a sequence of 20 trials. Each  
672 trial was presented for 1 sec with a 1 sec feedback phase and a 1 sec inter-stimulus interval.  
673 After every 20 trials, subjects had a 3 sec resting period, before the next block was announced.  
674 A lack of response to any cue was considered a miss.

675 **Reinforcement Learning:** We employed a probabilistic reinforcement learning task<sup>19</sup> to  
676 investigate differences in choice behaviour based on the hypothesized altered reward

677 processing. The task consisted of 500 trials, with a 10 second pause after the first 250 trials.  
678 Prior to this, subjects performed 10 practice trials with two initial options, which were changed  
679 before the main trials. We did this to avoid carry-over effects from practice to the main task.  
680 Throughout the task subjects were exposed to the same set of two options with independently  
681 varying reward probabilities. We informed subjects that it was possible that both options could  
682 be correct (i.e. rewarding) or incorrect (i.e. non-rewarding) on any given trial, as the reward  
683 probability of one option was independent of the other and vice versa. As shown in Fig. 1,  
684 each trial included three stages: (1) a cue onset stage (5 sec) where subjects had to decide  
685 between the two options and press the corresponding key. If they did not respond within that  
686 time frame, they would see a warning message indicating they should respond and try to be  
687 faster next time; (2) a choice feedback stage (1 s) where subjects received information about  
688 both the chosen (thick frame) and unchosen (thin frame) option (yellow - correct, red - wrong);  
689 and (3) an inter-trial interval ( $M = 1.5$  s, jittered between 0.9 to 2.1 s). Each correct choice was  
690 rewarded with 5 eurocents and added to their cumulative balance. To amplify the association  
691 between their performance and earnings, subjects saw a yellow bar filling up incrementally  
692 with each correct response. Each time the bar was completely filled, a 1 € coin was presented  
693 next to the bar indicating they had gained 1 € to their cumulative balance.

694

## 695 **Procedure**

696 We asked potential candidates to fill out an online survey with screening questions probing for  
697 exclusion criteria described in *Subjects*. Following this, we screened them for the general  
698 exclusion criteria. We invited suitable candidates to two separate test sessions. They were  
699 scheduled to occur with a maximal difference of one week to prevent major changes in weight  
700 and/or other bodily measures.

701 The first session always took place at 4.00 pm. We first provided subjects general  
702 information about the study procedure, after which subjects provided written informed consent

703 and filled out a battery of questionnaires. Moreover, we assessed their height, weight,  
704 abdominal, and visceral fat. These metrics were included as they could impact estradiol  
705 metabolism, and therefore, we included them as nuisance regressors in our linear models  
706 <sup>60,61</sup>. Twenty minutes after arrival, subjects provided a saliva sample. At the end of the session,  
707 we obtained a small amount of blood from the finger on a Micro FTA card and a buccal swab  
708 for genotyping.

709 On the second test day (see timeline, Fig. 1, bottom panel) we gave subjects general  
710 instructions and information regarding the day. After subjects provided informed consent, they  
711 filled out a mood (MDBF-A scale) and impulsiveness (BIS-11) questionnaire. We obtained a  
712 first saliva sample (T1, 20 minutes after arrival) to assess baseline hormone concentrations.  
713 This was followed by the N-BACK task which we used to assess their baseline working  
714 memory performance. Following the N-BACK, subjects applied a topical transparent gel on  
715 their chest and shoulders that either contained 2 mg of estradiol (Divigel, Orion Pharma AG,  
716 Zug Switzerland) or a placebo. They were randomly assigned estradiol or placebo in a double-  
717 blind manner. A male experimenter was present to ensure that the subjects applied the gel  
718 correctly. After gel application, we waited for two hours to allow estradiol levels to peak based  
719 on our previously established procedure <sup>34</sup>. During this time subjects could read magazines  
720 available in the room or books they brought with them. Fifteen minutes prior to the behavioural  
721 testing, we required them to fill out a second mood (MDBF-B scale) and impulsiveness (BIS-  
722 11) questionnaire followed by a second saliva sample (T2).

723 The behavioural testing commenced two hours after administration of the drug. The  
724 first task was the probabilistic reinforcement learning task which contained a block of practice  
725 trials to familiarise subjects with the task setup. After they completed the reinforcement  
726 learning task, three other decision-making tasks that were not the focus of this publication  
727 followed. After the behavioural testing, we probed subjects' beliefs about the treatment and  
728 the tasks. At the end of the study, each participant was paid in accordance to their  
729 performance.

730

## 731 **Analysis of behaviour**

### 732 **Statistical analysis of behaviour**

733 For the reinforcement learning task, we first looked at the cumulative difference in response  
734 proportions between the estradiol and placebo group. That is, we first computed the relative  
735 response probability for each group. This value tells us what percentage of subjects from the  
736 estradiol/placebo group chose one of the two options (e.g. option A, Fig. 2A). For the relative  
737 response probability, we also computed the corresponding standard errors of the mean which  
738 gave us a group-level probability and confidence estimate for choosing, e.g. option A, on each  
739 trial. We then subtracted the mean and both the lower and upper bound of the standard error  
740 of the mean between both groups for each trial. This gave us a difference in the expected  
741 chosen option for each trial that reflected how strong the groups differed in the probability of  
742 choosing, e.g. option A. Because we were interested in the absolute difference (i.e. we were  
743 not interested in the sign of the difference), we took the absolute value on a per trial basis and  
744 computed the cumulative choice difference from this which is presented in Fig. 2B.

745 To quantify statistical significance for this metric, on each trial we shuffled the  
746 responses of subjects and therefore decoupled labels from responses to build a null  
747 distribution that would tell us what kind of difference would be expected by chance. By shuffling  
748 responses on each trial, we took a more conservative approach to a permutation test when  
749 compared to shuffling responses within and across trials as it preserves systematic variance  
750 across trials in terms of subjects' choice. We then generated a null distribution of 2000  
751 iterations where for each iteration we computed the cumulative choice difference between two  
752 random groups that would be expected by chance. From these cumulative difference traces,  
753 we took the 100<sup>th</sup> percentile of the null distribution for each trial (null distribution in Fig. 2B).  
754 This value shows the maximum possible cumulative value that would have been expected by  
755 chance (i.e. by two random groups). Therefore, values that exceed this null distribution cannot



756 be attributable due to chance. Namely, if estradiol administration would not have impacted  
757 choice behaviour systematically, then cumulatively the difference between the actual estradiol  
758 and placebo group would not surpass the threshold of the null distribution.

759 We also computed this metric by averaging across trials. This gave us a measure of  
760 the average percentage in choice difference that was cumulative across trials. That is, on  
761 average, how strongly estradiol influenced choice difference. As above, we also did the same  
762 to the corresponding null distribution to observe whether the obtained empirical percentage  
763 exceeded the null distribution showing us what would have been expected by chance.

764 Similarly, we employed two-sample proportion z-tests which tests for whether the  
765 proportion of successes from one group is statistically different from the proportion of  
766 successes in the other group. These tests were not performed on the relative response  
767 probabilities but on the raw responses. That is, we tested whether the number of subjects who  
768 chose option A in one group was statistically significantly different from the other group. We  
769 repeated this test on every trial to determine on what percentage of trials there was a  
770 statistically significant difference between both groups.

771 As a measure of family-wise error control and to ensure that the values we observed  
772 were not due to chance, but due to estradiol administration, we shuffled the responses from  
773 subjects for each trial 2000 times and thereby decoupled responses from the labels. This  
774 yielded a null distribution that showed on what percentage of trials we could expect to find a  
775 statistically significant difference between two random groups with intact response variance  
776 across trials. By intact response variance we mean that on some trials, both groups were more  
777 likely to select one or the other option. Therefore, if we had also shuffled across trials and  
778 subjects, it would have been possible to invoke a larger number of false positives in our null  
779 distribution (i.e. lower percentages of trials with a statistically significant difference between  
780 both random groups). In short, for each permutation test we obtained a percentage reflecting  
781 the number of trials with a statistically significant difference in response proportions between  
782 two random groups that would have been obtained by chance.

783 For all cases where we computed a null distribution, we computed z-scores as  
784 measures of standardized effect size, as in <sup>62</sup>. We obtained a z-score by subtracting from the  
785 quantity of interest the mean of the null distribution and dividing it by the standard deviation of  
786 the null distribution. From this, we were able to use the Fisher-z-transformation to determine  
787 statistical significance.

788 Next, we computed accuracy, defined as the proportion of responses where the option  
789 with higher probability of reward was chosen. We collapsed this value across time (Fig. 2C).  
790 We computed two additional metrics. The first metric was a measure of switching behaviour;  
791 the number of trials where the chosen option on trial  $t$  and the one chosen at  $t + 1$  were  
792 different. The second metric quantified how many trials on average would subjects stay with  
793 the same option on subsequent trials if they were rewarded for the same option on trial  $t$ . We  
794 used this metric as a measure of staying behaviour.

795 Accuracy, reaction times, switching, and staying were statistically evaluated with  
796 general linear models where the first model always included a predictor for drug administration  
797 (estradiol, placebo). For all models we subsequently included interaction terms for the  
798 polymorphisms of genes of interest. Unless explicitly mentioned in the main result section, all  
799 reported linear models regressed out z-scored nuisance regressors. These included cortisol  
800 levels following administration, beliefs about the drug (see Belief Probes), and body  
801 measurement characteristics (weight, BMI, abdominal and visceral fat). Weight and BMI were  
802 summed together to generate a composite score <sup>63</sup> because of their high intrinsic correlation  
803 ( $r = 0.89$ ). (See also Supplementary Materials: Selecting linear models). General linear models  
804 for accuracy also included z-scored reaction times to control for accuracy-speed trade-offs.

805 In addition, we analysed choice autocorrelation (see Supplementary Materials: Impact  
806 of previous choice on current choice). In brief, for each participant we computed the relative  
807 contribution of choices made from  $t - 1$  to  $t - 7$  trials back (lags) on current choice. The  
808 obtained regression weights indicated how strong the relative influence of individual trials on  
809 the current choice was. We performed this both for choice as a function of previous choice

810 (pure choice autocorrelation) and choice as a function of previous rewarded choice (choice  
811 autocorrelation as a function of reward). We then performed independent samples Welch *t*-  
812 tests on individual lags to assess statistical significance.

813 To control for the variance of random effects such as subjects themselves, we used  
814 generalized linear mixed effects models that do not require data aggregation<sup>39,64</sup>. In two  
815 separate sets of analyses, we investigated whether treatment group (estradiol, placebo)  
816 interacted with the val<sup>158</sup>met polymorphism of the COMT gene or with the VNTR polymorphism  
817 of the DAT1 gene across trials. We fitted separate models, as the sample size per smallest  
818 cell was too small otherwise (Table S6, Supplementary Materials). We ran these models using  
819 R (version 3.6.0 R Development Core Team, 2019), with the lme4 package<sup>64</sup>. Our simplest  
820 model included only an intercept and a random effects structure which included subject-level  
821 intercepts. We used a likelihood ratio test to determine whether including group as a fixed  
822 factor improved the model fit. From there we fitted separate models for the VNTR  
823 polymorphism of the DAT1 gene and the val<sup>158</sup>met polymorphism of the COMT gene. In both  
824 cases, the starting model had a fixed effect interaction between group (estradiol, placebo) and  
825 gene (either COMT or DAT1) and subject-level intercepts as random effects. From this model  
826 we incrementally increased the complexity of our model until the most complex one. The most  
827 complex model was identical for both the VNTR and val<sup>158</sup>met polymorphism. The model  
828 included a three-way interaction between group (estradiol, placebo), gene (COMT or DAT1)  
829 and time (trial number). This was our main measure of interest and the one for which we  
830 hypothesized effects – that estradiol administration would differentially influence choice as the  
831 task progressed, depending on subjects' genotype. The random effect structure for this model  
832 included random intercepts for each subject. All models were estimated using the “nloptwrap”  
833 optimizer. Models without convergence or singularity warnings were then compared with  
834 likelihood ratio tests. We used BIC<sup>65</sup> to pick the winning model but also inspected their AIC  
835<sup>66</sup> and deviance scores for converging information. Below we report the two winning models;  
836 both models were identical, except for the polymorphism:

837  $y = choice \sim group * COMT * trial + (1|subject)$  1

838 In the case of DAT1, the winning model was:

839  $y = choice \sim group * DAT1 * trial + (1|subject)$  2

840

## 841 **Computational modelling**

842 A canonical approach to estimate subjects' learning is afforded by reinforcement learning. To  
843 test if subjects in the estradiol group would behave differently compared to the placebo group,  
844 because of increased striatal prediction errors, we formalized behaviour within a reinforcement  
845 learning framework and fitted several Q-learning models<sup>67</sup> with softmax choice rules:

846 Q-learning model (equation 3):

847 
$$Q_{t+1}^A = Q_t^A + \alpha(R_t^A - Q_t^A) \quad (3)$$

848 Softmax choice rule (equation 4):

849 
$$p = \frac{1}{1 + e^{\tau(Q_t^A - Q_t^B)}} \quad (4)$$

850 Where,  $t$  is time,  $A$  is option A,  $Q$  is subjective value,  $\alpha$  is the learning rate,  $R$  is the obtained  
851 reward, and  $\tau$  is the temperature parameter. Equations 3 and 4 represent our first model  
852 (model 1). In Q-learning, the basic idea is that agents learn subjective values for actions in  
853 their environment. Subjective values are learned and updated through a value function  
854 (Equation 3) following feedback after each action. A teaching signal known as the learning  
855 rate-weighted prediction error dictates how strongly the subjective value will be updated on  
856 each action. The prediction error corresponds to the difference between the obtained and  
857 expected reward (i.e. the subjective value prior to making the new choice). Within this process,  
858 the learning rate dictates how heavily new information will be weighted in proportion to  
859 previous information about the option, and therefore how strongly the subjective value will  
860 change from its current estimate. The softmax equation then yields the probability of selecting

861 an action given the learning rate and the temperature parameter, which reflects stochasticity  
862 of choice behaviour.

863 By employing computational modelling of this sort, we were able to obtain parameter  
864 estimates that quantify the difference in subjects' behaviour which we predicted. Our main  
865 hypothesis was that estradiol would increase reward sensitivity which should be captured by  
866 the learning rate, but not influence choice stochasticity across trials.

867 To obtain a more precise account of the effect of estradiol on reward processing, we  
868 extended the basic Q-learning model in several ways, as described below.

869 The first extension (model 2, equation 5a and 5b) allowed for separate learning rates for  $Q_A$   
870 and  $Q_B$ , because subjects were able to track the outcome of both the chosen and unchosen  
871 option.

$$872 \quad Q_{t+1}^A = Q_t^A + \alpha_A(R_t^A - Q_t^A) \quad (5a)$$

873

$$874 \quad Q_{t+1}^B = Q_t^B + \alpha_B(R_t^B - Q_t^B) \quad (5b)$$

875 Furthermore, due to reward stochasticity of our n-armed bandit implementation (obtained by  
876 a Gaussian random walk – Fig. 1B), we added an additional parameter  $\xi$ , representing  
877 irreducible noise<sup>68</sup> in our perceptual model (model 3, equation 6):

$$878 \quad p = \frac{1}{1 + e^{\tau(Q_t^A - Q_t^B)}}(1 - \xi) + \frac{\xi}{2} \quad (6)$$

879 Finally, we added a perseverance parameter  $\lambda$ <sup>69</sup> to the response model (model 4, equation  
880 7):

$$881 \quad p = \frac{1}{1 + e^{\tau(Q_t^A - Q_t^B + \lambda C)}}(1 - \xi) + \frac{\xi}{2} \quad (7)$$

882 Where  $C = 1$ , if the same cue was chosen on trial  $n$  and trial  $n+1$ , and  $C = -1$  if the converse  
883 was true. In summary, our full model space had separate learning rates for two separate

884 options, a choice stochasticity, and irreducible noise parameter. All other models were  
885 reduced cases of this model and all possible combinations of the described free parameters  
886 therefore yielded eight models in total for which we estimated parameters. The model fitting  
887 was performed using JAGS and the rjags (v 4.9) package in R (v 3.6.0). Each model was run  
888 with 5000 samples each with 1000 burn-in samples on three chains. Priors over parameters  
889 and hyperparameters were set to default as described in <sup>70</sup>. We computed the leave one out  
890 information criterion using the loo package <sup>71</sup> and used this metric to compare the models.  
891 Furthermore, we performed Bayesian model comparison by computing the (protected)  
892 exceedance probability <sup>72</sup> using the VBA toolbox <sup>73</sup> to determine the best model and compare  
893 its congruency with the LOOIC measure. Finally, we extracted the posterior predictive density  
894 for each participant as a measure of predictive power of the best model. This was then  
895 compared to the actual behaviour as a measure of static (accuracy collapsed across time) and  
896 dynamic (accuracy at each trial across subjects) predictive accuracy.

897

## 898 **References**

- 899 1. Schultz, W., Dayan, P. & Montague, P. R. A neural substrate of prediction and reward.  
900 *Science (80-. )*. **275**, 1593–1599 (1997).
- 901 2. Diekhof, E. K. Estradiol and the reward system in humans. *Curr. Opin. Behav. Sci.* **23**,  
902 58–64 (2018).
- 903 3. Saldanha, C. J., Remage-Healey, L. & Schlinger, B. A. Synaptocrine signaling:  
904 Steroid synthesis and action at the synapse. *Endocr. Rev.* **32**, 532–549 (2011).
- 905 4. Luine, V. N. Estradiol and cognitive function: Past, present and future. *Horm. Behav.*  
906 **66**, 602–618 (2014).
- 907 5. Colzato, L. S. & Hommel, B. Effects of estrogen on higher-order cognitive functions in  
908 unstressed human females may depend on individual variation in dopamine baseline

- 909 levels. *Front. Neurosci.* **8**, 65 (2014).
- 910 6. Thomas, J., Météreau, E., Déchaud, H., Pugeat, M. & Dreher, J. Hormonal treatment  
911 increases the response of the reward system at the menopause transition : A  
912 counterbalanced randomized placebo-controlled fMRI study.  
913 *Psychoneuroendocrinology* **50**, 167–180 (2014).
- 914 7. Dreher, J. *et al.* Menstrual cycle phase modulates reward-related neural function in  
915 women. *PNAS* **104**, 2465–2470 (2007).
- 916 8. Diekhof, E. K. & Ratnayake, M. Menstrual cycle phase modulates reward sensitivity  
917 and performance monitoring in young women: Preliminary fMRI evidence.  
918 *Neuropsychologia* **84**, 70–80 (2016).
- 919 9. Lévesque, D. & Di Paolo, T. Rapid conversion of high into low striatal D2-dopamine  
920 receptor agonist binding states after an acute physiological dose of 17 $\beta$ -estradiol.  
921 *Neurosci. Lett.* **88**, 113–118 (1988).
- 922 10. Becker, J. B. Gender Differences in Dopaminergic Function in Striatum and Nucleus  
923 Accumbens. *Pharmacol. Biochem. Behav.* **64**, 803–812 (1999).
- 924 11. Becker, J. B. Direct effect of 17 $\beta$ -estradiol on striatum: Sex differences in dopamine  
925 release. *Synapse* **5**, 157–164 (1990).
- 926 12. Pasqualini, C., Olivier, V., Guibert, B., Frain, O. & Leviel, V. Acute Stimulatory Effect  
927 of Estradiol on Striatal Dopamine Synthesis. *J. Neurochem.* **65**, 1651–1657 (1995).
- 928 13. Ball, P., Knuppen, R., Haupt, M. & Breuer, H. Interactions Between Estrogens and  
929 Catechol Amines III. Studies on the Methylation of Catechol Estrogens, Catechol  
930 Amines and other Catechols by the Catechol-O-Methyltransferase of Human Liver. *J.*  
931 *Clin. Endocrinol. Metab.* **34**, 736–746 (1972).
- 932 14. Yoest, K. E., Quigley, J. A. & Becker, J. B. Rapid effects of ovarian hormones in  
933 dorsal striatum and nucleus accumbens. *Horm. Behav.* **104**, 119–129 (2018).

- 934 15. Männistö, P. T. & Kaakkola, S. Catechol-O-methyltransferase (COMT): Biochemistry,  
935 molecular biology, pharmacology, and clinical efficacy of the new selective COMT  
936 inhibitors. *Pharmacol. Rev.* **51**, 593–628 (1999).
- 937 16. Jacobs, E. & D'Esposito, M. Estrogen Shapes Dopamine-Dependent Cognitive  
938 Processes: Implications for Women's Health. *J. Neurosci.* **31**, 5286–5293 (2011).
- 939 17. Schultz, W., Stauffer, R. W. & Lak, A. The phasic dopamine signal maturing: from  
940 reward via behavioural activation to formal economic utility. *Curr. Opin. Neurobiol.* **43**,  
941 139–148 (2017).
- 942 18. Glimcher, P. W. Understanding dopamine and reinforcement learning: the dopamine  
943 reward prediction error hypothesis. *PNAS* **108**, 15647–54 (2011).
- 944 19. Frank, M. J., Seeberger, L. C. & O'Reilly, R. C. By carrot or by stick: Cognitive  
945 reinforcement learning in Parkinsonism. *Science (80-. )*. **306**, 1940–1943 (2004).
- 946 20. Cools, R. *et al.* Striatal Dopamine Predicts Outcome-Specific Reversal Learning and  
947 Its Sensitivity to Dopaminergic Drug Administration. *J. Neurosci.* **29**, 1538–1543  
948 (2009).
- 949 21. den Ouden, H. E. M. *et al.* Dissociable Effects of Dopamine and Serotonin on  
950 Reversal Learning. *Neuron* **80**, 1090–1100 (2013).
- 951 22. Jocham, G., Klein, T. A. & Ullsperger, M. Dopamine-Mediated Reinforcement  
952 Learning Signals in the Striatum and Ventromedial Prefrontal Cortex Underlie Value-  
953 Based Choices. *J. Neurosci.* **31**, 1606–1613 (2011).
- 954 23. Jocham, G., Klein, T. a & Ullsperger, M. Differential Modulation of Reinforcement  
955 Learning by D2 Dopamine and NMDA Glutamate Receptor Antagonism. *J. Neurosci.*  
956 **34**, 13151–13162 (2014).
- 957 24. Eisenegger, C. *et al.* Role of dopamine D2 receptors in human reinforcement learning.  
958 *Neuropsychopharmacology* **39**, 2366–2375 (2014).



- 959 25. Swart, J. C. *et al.* Catecholaminergic challenge uncovers distinct Pavlovian and  
960 instrumental mechanisms of motivated (in)action. *Elife* **6**, 1–36 (2017).
- 961 26. Frank, M. J. *et al.* Genetic triple dissociation reveals multiple roles for dopamine in  
962 reinforcement learning. *PNAS* **104**, 16311–16316 (2007).
- 963 27. Eisenegger, C. *et al.* DAT1 Polymorphism Determines L-DOPA Effects on Learning  
964 about Others ' Prosociality. *PLoS One* **8**, e67820 (2013).
- 965 28. Pessiglione, M., Seymour, B., Flandin, G., Dolan, R. J. & Frith, C. D. Dopamine-  
966 dependent prediction errors underpin reward-seeking behaviour in humans. *Nature*  
967 **442**, 1042–1045 (2006).
- 968 29. Doll, B. B., Bath, K. G., Daw, N. D. & Frank, M. J. Variability in dopamine genes  
969 dissociates model-based and model-free reinforcement learning. *J. Neurosci.* **36**,  
970 1211–1222 (2016).
- 971 30. Nemmi, F. *et al.* Interaction between striatal volume and DAT1 polymorphism predicts  
972 working memory development during adolescence. *Dev. Cogn. Neurosci.* **30**, 191–  
973 199 (2018).
- 974 31. Sommer, T. *et al.* Effects of the experimental administration of oral estrogen on  
975 prefrontal functions in healthy young women. *Psychopharmacology (Berl)*. **235**, 3465–  
976 3477 (2018).
- 977 32. Bayer, J., Gläscher, J., Finsterbusch, J., Schulte, L. H. & Sommer, T. Linear and  
978 inverted U-shaped dose-response functions describe estrogen effects on  
979 hippocampal activity in young women. *Nat. Commun.* **9**, 1–12 (2018).
- 980 33. Jakob, K., Ehrentreich, H., Holtfrerich, S. K. C., Reimers, L. & Diekhof, E. K. DAT1-  
981 genotype and menstrual cycle, but not hormonal contraception, modulate  
982 reinforcement learning: Preliminary evidence. *Front. Endocrinol. (Lausanne)*. **9**, 60  
983 (2018).

- 984 34. Eisenegger, C., von Eckardstein, A., Fehr, E. & von Eckardstein, S. Pharmacokinetics  
985 of testosterone and estradiol gel preparations in healthy young men.  
986 *Psychoneuroendocrinology* **38**, 171–178 (2013).
- 987 35. Cools, R. & D'Esposito, M. Inverted-U-shaped dopamine actions on human working  
988 memory and cognitive control. *Biol. Psychiatry* **69**, 113–125 (2011).
- 989 36. Daw, N. D., Doherty, J. P. O., Dayan, P., Seymour, B. & Dolan, R. J. Cortical  
990 substrates for exploratory decisions in humans. *Nature* **441**, 876–879 (2006).
- 991 37. Reimers, L., Büchel, C. & Diekhof, E. K. How to be patient. The ability to wait for a  
992 reward depends on menstrual cycle phase and feedback-related activity. *Front.*  
993 *Neurosci.* **8**, 401 (2014).
- 994 38. Baayen, R. H., Davidson, D. J. & Bates, D. M. Mixed-effects modeling with crossed  
995 random effects for subjects and items. *J. Mem. Lang.* **59**, 390–412 (2008).
- 996 39. Bolker, B. M. *et al.* Generalized linear mixed models: a practical guide for ecology and  
997 evolution. *Trends in Ecology and Evolution* vol. 24 127–135 (2009).
- 998 40. Chowdhury, R. *et al.* Dopamine restores reward prediction errors in old age. *Nat.*  
999 *Neurosci.* **16**, 648–653 (2013).
- 1000 41. Chowdhury, R., Guitart-Masip, M., Bunzeck, N., Dolan, R. J. & Düzel, E. Dopamine  
1001 modulates episodic memory persistence in old age. *J. Neurosci.* **32**, 14193–14204  
1002 (2012).
- 1003 42. Smith, C. T., Sierra, Y., Oppler, S. H. & Boettiger, C. A. Ovarian Cycle Effects on  
1004 Immediate Reward Selection Bias in Humans: A Role for Estradiol. *J. Neurosci.* **34**,  
1005 5468–5476 (2014).
- 1006 43. Diekhof, E. K. Be quick about it. Endogenous estradiol level, menstrual cycle phase  
1007 and trait impulsiveness predict impulsive choice in the context of reward acquisition.  
1008 *Horm. Behav.* **74**, 186–193 (2015).

- 1009 44. Geniole, S. N. *et al.* Using a Psychopharmacogenetic Approach To Identify the  
1010 Pathways Through Which—and the People for Whom—Testosterone Promotes  
1011 Aggression. *Psychol. Sci.* **30**, 481–494 (2019).
- 1012 45. Losecaat Vermeer, A. B. *et al.* Exogenous testosterone increases status-seeking  
1013 motivation in men with unstable low social status. *Psychoneuroendocrinology* **113**,  
1014 (2020).
- 1015 46. Colzato, L. S., Hertsig, G. & Wildenberg, van den Hommel, B. Estrogen modulates  
1016 inhibitory control in healthy human females: evidence from the stop-signal paradigm.  
1017 *Neuroscience* **167**, 709–715 (2010).
- 1018 47. Colzato, L. S., Pratt, J. & Hommel, B. Estrogen modulates inhibition of return in  
1019 healthy human females. *Neuropsychologia* **50**, 98–103 (2012).
- 1020 48. Schaaf, M. E. Van Der, Fallon, S. J., Huurne, N., Buitelaar, J. & Cools, R. Working  
1021 Memory Capacity Predicts Effects of Methylphenidate on Reversal Learning.  
1022 *Neuropsychopharmacology* **38**, 2011–2018 (2013).
- 1023 49. Daw, N. D., Gershman, S. J., Seymour, B., Dayan, P. & Dolan, R. J. Model-based  
1024 influences on humans' choices and striatal prediction errors. *Neuron* **69**, 1204–1215  
1025 (2011).
- 1026 50. Wunderlich, K., Smittenaar, P. & Dolan, R. J. Dopamine Enhances Model-Based over  
1027 Model-Free Choice Behavior. *Neuron* **75**, 418–424 (2012).
- 1028 51. Sheehan, D. V. *et al.* The validity of the Mini International Neuropsychiatric Interview  
1029 (MINI) according to the SCID-P and its reliability. *Eur. Psychiatry* **12**, 232–241 (1997).
- 1030 52. Steyer, R., Schwenkmezger, P., Notz, P. & Eid, M. Testtheoretische Analysen des  
1031 Mehrdimensionalen Befindlichkeitsfragebogen. *Diagnostica* **40**, 320–328 (1994).
- 1032 53. Patton, J. H., Stanford, M. S. & Barratt, E. S. Factor structure of the barratt  
1033 impulsiveness scale. *J. Clin. Psychol.* **51**, 768–774 (1995).

- 1034 54. Carver, Charles, S. & White, Teri, L. Behavioral Inhibition, Behavioral Activation, and  
1035 Affective Responses to Impending Reward and Punishment: The BIS/BAS Scales. *J.*  
1036 *Pers. Soc. Psychol.* **67**, 319–333 (1994).
- 1037 55. Kim, S. H., Yoon, H. S., Kim, H. & Hamann, S. Individual differences in sensitivity to  
1038 reward and punishment and neural activity during reward and avoidance learning.  
1039 *Soc. Cogn. Affect. Neurosci.* **10**, 1219–1227 (2014).
- 1040 56. Sali, A. W., Anderson, B. A. & Yantis, S. Reinforcement learning modulates the  
1041 stability of cognitive control settings for object selection. *Front. Integr. Neurosci.* **7**, 95  
1042 (2013).
- 1043 57. Unger, K., Heintz, S. & Kray, J. Punishment sensitivity modulates the processing of  
1044 negative feedback but not error-induced learning. *Front. Hum. Neurosci.* **6**, 186  
1045 (2012).
- 1046 58. Lighthall, N. R., Gorlick, M. A., Schoeke, A., Frank, M. J. & Mather, M. Stress  
1047 Modulates Reinforcement Learning in Younger and Older Adults. *Psychol Aging* **28**,  
1048 35–46 (2013).
- 1049 59. Eisenegger, C., Naef, M., Snozzi, R., Heinrichs, M. & Fehr, E. Prejudice and truth  
1050 about the effect of testosterone on human bargaining behaviour. *Nature* **463**, 356–359  
1051 (2010).
- 1052 60. Fishman, J., Boyar, R. M. & Hellman, L. Influence of body weight on estradiol  
1053 metabolism in young women. *J. Clin. Endocrinol. Metab.* **41**, 989–991 (1975).
- 1054 61. Schneider, J. *et al.* Effects of Obesity on Estradiol Metabolism: Decreased Formation  
1055 of Nonuterotropic Metabolites. *J. Clin. Endocrinol. Metab.* **56**, 973–978 (1983).
- 1056 62. Maidenbaum, S., Miller, J., Stein, J. M. & Jacobs, J. Grid-like hexadirectional  
1057 modulation of human entorhinal theta oscillations. *PNAS* **115**, 10798–10803 (2018).
- 1058 63. Aeberli, I., Molinari, L. & Zimmermann, M. B. A composite score combining waist

- 1059 circumference and body mass index more accurately predicts body fat percentage in  
1060 6- to 13-year-old children. *Eur. J. Nutr.* **52**, 247–253 (2013).
- 1061 64. Bates, D., Mächler, M., Bolker, B. M. & Walker, S. C. Fitting linear mixed-effects  
1062 models using lme4. *J. Stat. Softw.* **67**, (2015).
- 1063 65. Schwarz, G. Estimating the Dimension of a Model. *Ann. Stat.* **6**, 461–464 (1978).
- 1064 66. Akaike, H. A New Look at the Statistical Model Identification. *IEEE Trans. Automat.*  
1065 *Contr.* **19**, 716–723 (1974).
- 1066 67. Watkins, C. J. C. H. & Dayan, P. Q-learning. *Mach. Learn.* **8**, 279–292 (1992).
- 1067 68. de Boer, L. *et al.* Dorsal striatal dopamine D1 receptor availability predicts an  
1068 instrumental bias in action learning. *PNAS* **116**, 261–270 (2019).
- 1069 69. Rutledge, R. B. *et al.* Dopaminergic Drugs Modulate Learning Rates and  
1070 Perseveration in Parkinson ' s Patients in a Dynamic Foraging Task. *J. Neurosci.* **29**,  
1071 15104–15114 (2009).
- 1072 70. Ahn, W.-Y., Haines, N. & Zhang, L. Revealing Neurocomputational Mechanisms of  
1073 Reinforcement Learning and Decision-Making With the hBayesDM Package. *Comput.*  
1074 *Psychiatry* **1**, 24–57 (2017).
- 1075 71. Vehtari, A., Gelman, A. & Gabry, J. Practical Bayesian model evaluation using leave-  
1076 one-out cross-validation and WAIC. *Stat. Comput.* **27**, 1413–1432 (2017).
- 1077 72. Rigoux, L., Stephan, K. E., Friston, K. J. & Daunizeau, J. Bayesian model selection for  
1078 group studies - Revisited. *Neuroimage* **84**, 971–985 (2014).
- 1079 73. Daunizeau, J., Adam, V. & Rigoux, L. VBA: A Probabilistic Treatment of Nonlinear  
1080 Models for Neurobiological and Behavioural Data. *PLoS Comput. Biol.* **10**, (2014).
- 1081 74. Longcope, C., Kato, T. & Horton, R. Conversion of blood androgens to estrogens in  
1082 normal adult men and women. *J. Clin. Invest.* **48**, 2191–2201 (1969).

- 1083 75. Yaffe, K. *et al.* Androgen receptor CAG repeat polymorphism is associated with  
1084 cognitive function in older men. *Biol. Psychiatry* **54**, 943–946 (2003).
- 1085 76. Beyenburg, S. *et al.* Androgen receptor mRNA expression in the human  
1086 hippocampus. *Neurosci. Lett.* **294**, 25–28 (2000).
- 1087 77. Kovacs, D. *et al.* The androgen receptor gene polyglycine repeat polymorphism is  
1088 associated with memory performance in healthy Chinese individuals.  
1089 *Psychoneuroendocrinology* **34**, 947–952 (2009).
- 1090 78. Comings, D. E., Chen, C., Wu, S. & Muhleman, D. Association of the androgen  
1091 receptor gene (AR) with ADHD and conduct disorder. *Neuroreport* **10**, 1589–1592  
1092 (1999).
- 1093 79. Gillies, G. E. & McArthur, S. Estrogen actions in the brain and the basis for differential  
1094 action in men and women: A case for sex-specific medicines. *Pharmacol. Rev.* **62**,  
1095 155–198 (2010).
- 1096 80. Bayer, J. *et al.* Estrogen and the male hippocampus: Genetic variation in the  
1097 aromatase gene predicting serum estrogen is associated with hippocampal gray  
1098 matter volume in men. *Hippocampus* **23**, 117–121 (2013).
- 1099 81. Kravitz, H. M., Meyer, P. M., Seeman, T. E., Greendale, G. A. & Sowers, M. F. R.  
1100 Cognitive Functioning and Sex Steroid Hormone Gene Polymorphisms in Women at  
1101 Midlife. *Am. J. Med.* **119**, 94–102 (2006).
- 1102 82. Ma, S. L. *et al.* Polymorphisms of the estrogen receptor (ESR1) gene and the risk of  
1103 Alzheimer's disease in a southern Chinese community. *Int. Psychogeriatrics* **21**, 977–  
1104 986 (2009).
- 1105 83. Almey, A., Milner, T. A. & Brake, W. G. Estrogen receptors in the central nervous  
1106 system and their implication for dopamine-dependent cognition in females. *Horm.*  
1107 *Behav.* **74**, 125–138 (2015).

1108

1109

1110 **Supplementary Materials:**

1111 **A causal role for estradiol in human reinforcement learning**

1112 Sebastijan Veselic<sup>1,2,3\*</sup>, Gerhard Jocham<sup>4</sup>, Christian Gausterer<sup>5</sup>, Bernhard Wagner<sup>6</sup>,  
1113 Miriam Ernhoefer-Reßler<sup>6</sup>, Rupert Lanzenberger<sup>7</sup>, Clauss Lamm<sup>1,8</sup>, Christoph  
1114 Eisenegger<sup>1</sup> & Annabel Losecaat Vermeer<sup>1\*</sup>

1115

1116 **Methods**

1117 **Genotyping**

1118 **DNA extraction and quantification**

1119 Buccal swabs were collected using sterile cotton swabs (Sarstedt AG, Germany). DNA  
1120 was extracted from swabs using the QIAamp DNA Mini kit (Qiagen, Hilden, Germany)  
1121 and eluted in a final volume of 50 µL of QIAamp buffer AE (Qiagen). Human nuclear  
1122 DNA was quantified using the Applied Biosystems (AB) 7500 real-time PCR instrument  
1123 (Thermo Fisher Scientific, Waltham, MA) and the Quantifiler Human Plus quantification  
1124 Kit (AB) following manufacturer's recommendations.

1125 **Typing of repeat length polymorphisms**

1126 Genomic DNA fragments that contain polymorphic repeat sequences were amplified in  
1127 two separate reactions: i.e. a multiplex PCR (simultaneously targeting AR(CAG)<sub>n</sub>,  
1128 DAT1 VNTR, Erα(TA)<sub>n</sub> and Erβ(CA)<sub>n</sub>) and a singleplex PCR (targeting solely  
1129 AR(GGN)<sub>n</sub>), respectively.

1130 The multiplex PCR was performed using 5 ng template DNA in a reaction mix (total  
1131 volume of 25 µL) consisting of 1 × GeneAmp PCR buffer (AB), 0.25 mM each dNTP,  
1132 2.5 units AmpliTaq Gold polymerase (AB) and target specific primers (AR(CAG), DAT1,  
1133 ERα and Erβ; including 5'-fluorescent-dye-labeled forward primers; details provided in



1134 Table 1). The following protocol was applied using the Veriti 96-well thermal cycler (AB):  
1135 35 cycles at 95 °C for 30 seconds, 55 °C for 1 minute, and 72 °C for 1 minute. Before  
1136 the first cycle, an initial denaturation (95 °C for 5 minutes) was included, and the last  
1137 cycle was followed by a final extension step at 72 °C for 45 minutes.

1138 The singleplex PCR was conducted using 5 ng template DNA in a reaction mix  
1139 (total volume of 20 µL) containing target specific primers (AR(GGN)<sub>n</sub>, details provided  
1140 in Table 1)), 0.5 µL Phire Hot Start II DNA polymerase (Thermo Fisher) in 1 × Phire  
1141 reaction buffer (Thermo Fisher). Amplification was carried out on the Veriti thermal  
1142 cycler (AB) and included an initial denaturation step at 98 °C for 30 seconds, followed  
1143 by 33 cycles of 10 seconds at 98 °C, 30 seconds at 60 °C and 30 seconds at 72 °C.  
1144 The last cycle was followed by a final extension at 72 °C for 10 minutes.

1145 Aliquots of PCR products were diluted with Hi-Di formamide (AB), mixed with  
1146 internal lane standard LIZ 600 v.2 (AB) and separated on the ABI 3500 Genetic  
1147 Analyzer applying standard conditions. The number of repeats predicted by the  
1148 GeneMapper ID-X software (AB) was in full agreement to the actual repeats determined  
1149 by direct sequencing of PCR products using the BigDye Terminator Sequencing Kit  
1150 v3.1 (AB) in selected DNA samples.

1151

1152

1153

1154

1155

1156

1157 **Table S1. Panel of loci and primer sets used for the typing of repeat length**  
 1158 **polymorphisms**

| Marker                            | Location <sup>b</sup>       | Primer sequence 5'-3' <sup>c</sup> | Dye   | Orientation | Conc. (nM) <sup>d</sup> |
|-----------------------------------|-----------------------------|------------------------------------|-------|-------------|-------------------------|
| AR(GGN) <sub>n</sub> <sup>a</sup> | chrX:67546447-67546603(+)   | CCTGGCACACTCTCTTCACA               | VIC   | forward     | 625                     |
|                                   |                             | <i>GTTTCTGGCCGAGTGTAGCCGTAG</i>    |       | reverse     |                         |
| AR(CAG) <sub>n</sub>              | chrX:67545237-67545434(+)   | CGCGAAGTGATCCAGAACC                | 6-FAM | forward     | 200                     |
|                                   |                             | <i>GTTTCTAGAACCATCCTCACCTGCT</i>   |       | reverse     |                         |
| DAT1<br>VNTR                      | chr5:1393559-1394008(-)     | TGTGGTGTAGGGAACGGCCTGAGA           | 6-FAM | forward     | 400                     |
|                                   |                             | TGTTGGTCTGCAGGCTGCCTGCAT           |       | reverse     |                         |
| ERα(TA) <sub>n</sub>              | chr6:151806472-151806594(+) | AACTATCCAAGATTATAGACGCATGA         | NED   | forward     | 600                     |
|                                   |                             | <i>GTTTCTAACATGCACACGCACATACA</i>  |       | reverse     |                         |
| Erβ(CA) <sub>n</sub>              | chr14:64253529-64253650(-)  | GTGCTGCGAGCAGAGATA                 | PET   | forward     | 800                     |
|                                   |                             | <i>GTTTCTAATGAGTGGGCCTCCCTTAG</i>  |       | reverse     |                         |

1159 <sup>a</sup> AR(GGN)<sub>n</sub> primers only used in singleplex PCR; all other primers combined in a multiplex PCR  
 1160 <sup>b</sup> Chromosome number and genomic location of targeted sequence (orientation provided in brackets)  
 1161 according to UCSC version hg38 (<http://genome.ucsc.edu/>)  
 1162 <sup>c</sup> The non-specific primer tail is underlined in Italics  
 1163 <sup>d</sup> The final primer concentrations in the reaction mix  
 1164

1165 **Typing of the COMT Val158Met polymorphism**

1166 SNaPshot minisequencing was applied for the typing of Val158Met variants in the  
 1167 COMT gene. Therefore, a 177 bp fragment of genomic DNA harbouring the causative  
 1168 single nucleotide polymorphism (SNP rs4680) in its centre was amplified by PCR. The  
 1169 reaction mix comprised 5 ng template DNA, 1 × GeneAmp PCR buffer (AB), 0.25 mM  
 1170 each dNTP, 2.5 units AmpliTaq Gold polymerase (AB) and target specific primers  
 1171 (details provided in Table 2) in a total reaction volume of 25 µL. Thermal cycling was  
 1172 performed applying the Veriti cycler (AB) and conditions as follows: 95 °C for 5 min; 35  
 1173 cycles of 95 °C for 15 seconds, 59 °C for 30 seconds and 72 °C for 1 minute; final  
 1174 extension at 72 °C for 5 minutes.

1175

1176

1177

1178

1179 **Table S2. Primer set used for PCR of the COMT fragment**

| Marker | Location <sup>a</sup>      | Primer sequence 5'-3' <sup>b</sup> | Orientation | Conc. (nM) <sup>c</sup> |
|--------|----------------------------|------------------------------------|-------------|-------------------------|
| COMT   | chr22:19963623-19963799(+) | GGGCCTACTGTGGCTACTCA               | forward     | 400                     |
|        |                            | GCCCTTTTTCCAGGTCTGA                | reverse     |                         |

1180 <sup>a</sup> Chromosome number and genomic location of targeted sequence (orientation provided in brackets)  
 1181 according to UCSC version hg38 (<http://genome.ucsc.edu/>).

1182  
 1183 PCR products were purified from excess primers and dNTPs by ExoSAP-IT (Thermo  
 1184 Fisher) treatment following manufacturer's recommendations. Minisequencing was  
 1185 conducted on a Veriti thermal cycler (AB) in a total volume of 10 µL containing 3 µL of  
 1186 purified PCR product, 5 µL SNaPshot Multiplex Ready Reaction mix (Thermo Fisher)  
 1187 and 2 µL minisequencing primer (2 µM; details see Table 3). The cycling conditions (25  
 1188 cycles) were as follows: denaturation at 96 °C for 10 seconds, annealing at 50 °C for 5  
 1189 seconds and extension at 60 °C for 30 seconds.

1190

1191 **Table S3. Minisequencing primer information**

| SNP sequence variation | Location <sup>a</sup>   | Primer sequence 5'-3' <sup>b</sup>            | Orientation |
|------------------------|-------------------------|-----------------------------------------------|-------------|
| G>A                    | chr22:19963728-19963747 | <u>(GATC)<sub>4</sub></u> GGATGGTGGATTTGCTGGC | forward     |

1192 <sup>a</sup> Chromosome number and genomic location of primer binding site (orientation provided in brackets)  
 1193 according to UCSC version hg38 (<http://genome.ucsc.edu/>). The targeted SNP rs4680 is located at position  
 1194 chr22:19963748.

1195 <sup>b</sup> The non-specific primer tail is underlined in Italics  
 1196

1197 ExoSAP-IT treatment was again applied for the clean-up of the minisequencing  
 1198 reaction. 5 µl of purified minisequencing reaction product was then mixed with 9.3 µL  
 1199 Hi-Di formamide (AB) and 0.2 µL of GeneScan-LIZ 120 internal size standard (AB).  
 1200 After a denaturing step for 5 min at 98 °C followed by cooling to 4 °C the fragments  
 1201 were separated on an ABI PRISM 310 Genetic Analyzer (AB) with POP4 polymer and  
 1202 analysed with GeneMapper v3.2 software. Calling of SNP variants based on

1203 minisequencing was in full agreement to results from direct sequencing of PCR  
1204 products in selected DNA samples.

1205

## 1206 **Hormone concentrations**

1207 Quantification of estrone and estradiol in saliva samples was performed with  
1208 derivatization using pentafluorobenzoyl chloride (PFBCl) and the addition of the  
1209 isotopically labeled internal standards estrone-d<sub>4</sub> and estradiol-d<sub>5</sub>. Organic saliva was  
1210 reacted with 1.0 mL 1% PFBCl and 0.1 mL pyridine at 60°C for 30 min. The  
1211 derivatization agents were evaporated, the sample was reconstituted with 0.5 mL  
1212 NaHCO<sub>3</sub> and extracted with 1 mL n-hexane. The organic phase was substituted with  
1213 0.2 mL dodecane and subjected to optimized GC-MS/MS analysis using an Agilent  
1214 7890 GC with Agilent DB-17ht 15 m x 0.25 mm x 0.15 µm capillary column connected  
1215 to an Agilent 7010 tandem mass spectrometer operated in MRM mode using negative  
1216 chemical ionization at 150°C with methane as a reaction gas (40%, 2 mL/min). Method  
1217 validation was performed using ion transition m/z 464 -> 400 as a quantifier for estrone  
1218 and m/z 660 -> 596 for estradiol, whereas a LLOQ of 1.92 fg o.c. and 1.94 fg was  
1219 obtained, respectively.

1220 Quantification of hydrocortisone and testosterone in saliva samples was  
1221 performed using liquid chromatography tandem mass spectrometry (LCMS/MS), with  
1222 an Agilent 6460 with electrospray ionization in positive mode coupled to a 1290 UHPLC  
1223 system. Collision energy was optimized for specific MRM transitions of Hydrocortisone  
1224 (363.2/121.1 m/z; 363.2/91.1 m/z), Testosterone (289.2/109.1; 289.2/97.1 m/z), 2,3,4-  
1225 <sup>13</sup>C<sub>3</sub>-Hydrocortisone (366.2/124 m/z) and 2,3,4-<sup>13</sup>C<sub>3</sub>-Testosterone (292.2/100 m/z).  
1226 Agilent Poroshell 120 EC-C18 was used for chromatographic separation under  
1227 reversed phase conditions. The internal standard preparation and internal standard  
1228 mixture was prepared containing 2,3,4-<sup>13</sup>C<sub>3</sub>-Hydrocortisone; 2,3,4-<sup>13</sup>C<sub>3</sub>-  
1229 Testosterone, 2,4,16,16,17-d<sub>5</sub>-17b-Estradiol and concentration of 5ng/mL each.

1230 Samples were prepared by adding 100  $\mu$ l internal standards (5 ng/mL) to 500 $\mu$ l plasma  
1231 or saliva and the steroids were extracted using 4 mL MTBE. After 10 min. overhead  
1232 shacking, the samples were centrifuged for 5 min. at 3000 rpm and the top MTBE layer  
1233 was transferred to a test tube. MTBE was evaporated using a centrivap concentrator at  
1234 40°C (Labconco). The residual sample was then re-dissolved in methanol and analyzed  
1235 by LC-MS/MS.

1236

## 1237 **Questionnaires**

1238 **Mood:** To control for a potential confound of mood, tiredness, or alertness from the  
1239 treatment affecting subjects' performance <sup>24</sup>, we assessed participants' self-reported  
1240 mood before and after administration of the treatment, using the German Multidimensional  
1241 Mood State Questionnaire ("Der Mehrdimensionale Befindlichkeitsfragebogen - MDBF)  
1242 <sup>52</sup> Both versions of this questionnaire (A and B) contain 12 items with a 5-level Likert  
1243 scale and three subscales that test for different continuums of mood (Good-Bad [ $\alpha_{pre} =$   
1244  $.81$ ,  $\alpha_{post} = .77$ ], Awake-Tired [ $\alpha_{pre} = .84$ ,  $\alpha_{post} = .87$ ], Calm-Nervous [ $\alpha_{pre} = .73$ ,  $\alpha_{post} =$   
1245  $.75$ ]).

1246 **Impulsiveness:** We used the Barratt Impulsiveness Scale (BIS-11; <sup>53</sup> to measure  
1247 participants' impulsiveness as <sup>43</sup> observed that variations in estradiol levels differentially  
1248 affected women with low trait as opposed to high trait impulsiveness. BIS-11 is a widely  
1249 used measure for impulsiveness with 30 items describing common behaviour and  
1250 preferences related to (non)impulsiveness which individuals have to rate on a 4-point  
1251 scale (1 - rarely/never, almost always/always - 4). The General Impulsiveness ( $\alpha_{pre} =$   
1252  $.71$ ,  $\alpha_{post} = .75$ ) factor together with its three second-order factors (Motor Impulsiveness  
1253 ( $\alpha_{pre} = .47$ ,  $\alpha_{post} = .54$ ) Nonplanning Impulsiveness ( $\alpha_{pre} = .6$ ,  $\alpha_{post} = .63$ ), Attentional  
1254 Impulsiveness ( $\alpha_{pre} = .49$ ,  $\alpha_{post} = .52$ ) are reported.

1255 **Behavioural inhibition and activation:** we measured the trait behavioural activation  
1256 and inhibition with the Behavioural inhibition/Behavioural Activation Scales (BIS/BAS;  
1257 <sup>54</sup>. The BAS scale is a 24-item questionnaire answered on a four-level scale (1- very  
1258 true for me, 4 - very false for me). It is subdivided into Drive ( $\alpha = .74$ ), Fun Seeking ( $\alpha =$   
1259  $.67$ ), and Reward Responsiveness ( $\alpha = .6$ ) while the BIS scale ( $\alpha = .77$ ) is  
1260 unidimensional. Drive is thought to measure the persistent pursuit of goals (e.g. “I go  
1261 out of my way to get the things I want”), Fun Seeking: the desire for new rewards and  
1262 willingness to approach events that would be potentially rewarding (e.g. “I crave  
1263 excitement and new sensations”), while Reward Responsiveness focuses on positive  
1264 responses that would occur if a reward is anticipated (e.g. “When I am doing well at  
1265 something I love to keep doing it”). Finally, the BIS scale measures sensitivity to  
1266 negative events (e.g. “Criticism or scolding hurts me quite a bit”).

1267

### 1268 **Belief probes**

1269 In addition, we probed participants’ beliefs and confidence about estradiol (e.g. whether  
1270 they believed they received estradiol or a placebo, how certain they were of this answer,  
1271 and whether they noticed any changes). This was done to later regress out the potential  
1272 contribution of beliefs arising, for example, from participants researching potential side  
1273 effects of the hormone prior the experiment. Namely, individuals’ beliefs about having  
1274 received the hormone and beliefs about the effects of the hormone on their performance  
1275 have previously shown to modulate behaviour independent of whether participants had  
1276 received the hormone <sup>59</sup>.

1277

### 1278 **Matching of both groups**

1279 We compared both treatment groups for age and other bodily characteristics (i.e. BMI,  
1280 height, weight, visceral, and abdominal fat) and potential differences in self-reported

1281 mood (MDBF), impulsiveness (BIS-11) and reward responsiveness (BIS/BAS) (see  
1282 Questionnaires, Table S4 and S5). We used two-tailed independent samples Welch t-  
1283 tests, or Wilcoxon signed-rank test if assumptions of normality were not met, to test  
1284 whether the groups matched on all variables. To test for mood differences after  
1285 administration between the treatment groups, we performed an ANCOVA for each of  
1286 the three subscales of the MDBF questionnaire where we controlled for baseline mood  
1287 scores. Two-way ANOVAs were further performed on the individual subscales of the  
1288 BIS-11 questionnaire to investigate whether there was an interaction between the group  
1289 (estradiol, placebo) and session (pre, post) on impulsiveness.

1290 To compare working memory capacity assessed by the N-BACK task, we  
1291 analyzed target accuracy, reaction times, and d-prime. We analyzed this with an  
1292 ANOVA containing the between-subject variable group (estradiol, placebo) and within-  
1293 subject variable for condition together with an interaction term for group and condition.

1294

## 1295 **Results**

### 1296 **Matching of both groups**

1297 In the first part of the supplementary results, Table S4 and S5 show that our random  
1298 assignment was successful as the groups did not differ in any of the measured  
1299 parameters before (Table S4) administration and as a function of administration (Table  
1300 S5). However, we did observe the expected change in estradiol metabolite  
1301 concentrations in the estradiol group, outlined below.

1302

### 1303 **Hormone concentrations**

1304 We observed a statistically significant post-administration difference between both  
1305 groups in log-transformed estradiol concentrations ( $W = 1545$ , 95% CI [0.03, 1.87],  $p <$   
1306  $.05$ ) with the estradiol group having higher estradiol metabolite concentration following  
1307 administration (estradiol:  $Mdn = 41.77 \pm 531.54$ ), placebo:  $Mdn = 5.55 \pm 230.23$ ) but not

1308 before (estradiol:  $Mdn = 3.38 \pm 230.97$ ), placebo:  $Mdn = 1.89 \pm 21.92$ ) compared to the  
1309 placebo group ( $W = 1498$ , 95% CI [-0.05, 1.03],  $p = .09$ ). We report the median for the  
1310 values above because even after log-transforming the metabolite concentrations, they  
1311 were not distributed normally. Because of this a mean would not have been a good  
1312 measure of central tendency. Importantly, because we have observed high  
1313 interindividual variance in estradiol concentrations prior to administration, we have  
1314 reason to believe the obtained metabolite concentrations were contaminated during the  
1315 handling of the samples following our data collection. Namely, in previous work such  
1316 baseline variation was not observed despite an identical procedure and dosage with  
1317 the main difference being that serum levels of estradiol were measured there<sup>34</sup>. Log-  
1318 transformed estrone and cortisol concentrations after administration were also  
1319 examined showing no differences between both groups. Estrone: (experimental:  $Mdn =$   
1320  $8.79 \pm 4226.69$ ), control:  $Mdn = 5.80 \pm 161.99$ ) ( $W = 1427$ , 95% CI [-0.17, 1.05],  $p = .16$ ),  
1321 cortisol: (experimental:  $Mdn = 0.77 \pm 0.94$ ), control:  $Mdn = 0.73 \pm 1.15$ ) ( $W = 1207$ , 95%  
1322 CI [-0.31, 0.27],  $p = .90$ ).

1323

### 1324 **Bodily measures and behavioural characteristics**

1325 As outlined in Table S4, both the estradiol and placebo group were also matched for  
1326 their weight, height, BMI, visceral, abdominal fat, and individual sub scales of the  
1327 BIS/BAS questionnaire (Drive, Reward, Fun-Seeking, Behavioural Inhibition). Similarly,  
1328 separate one-way ANOVAs revealed no interaction for the four subscales of BIS-11  
1329 (Table S5) (General:  $F_{(1, 195)} = 0.01$ ,  $p = 0.91$ , Attentional:  $F_{(1, 195)} = 0.04$ ,  $p = .85$ , Motor:  
1330  $F_{(1, 195)} = 0.59$ ,  $p = .45$ , nonplanning:  $F_{(1, 195)} = 0.08$ ,  $p = .78$ ).

1331 Furthermore, we ensured that both the estradiol and placebo group did not differ  
1332 in pre-existing differences in working memory (Figure S2A, S2B, S2C) in addition to  
1333 testing whether administration influenced mood (Figure S2D). By doing so we were able  
1334 to exclude differences in working memory and mood leading to the observed results  
1335<sup>27,48</sup>. Separate ANCOVAs for the three subscales (Alertness, Mood, Calmness) of the



1336 MDBF revealed no differences in post-administration (Post) scores between the  
 1337 estradiol and placebo group when controlling for baseline scores (Pre) as a covariate  
 1338 (Mood:  $F_{(1, 96)} = 0.30$ ,  $p = 0.58$ ,  $\Omega^2 = 0.08$ ; Alertness:  $F_{(1, 96)} = 1.35$ ,  $p = .25$ ,  $\Omega^2 = 0.01$ ;  
 1339 Calmness:  $F_{(1, 96)} = 1.34$ ,  $p = .25$ ,  $\Omega^2 = 0.01$ ). Similarly, we observed no interaction  
 1340 between group membership and post-administration score (Mood:  $F_{(1, 96)} = 0.06$ ,  $p = .81$ ,  
 1341  $\Omega^2 = 0.01$ ; Alertness:  $F_{(1, 96)} = 1.88$ ,  $p = .17$ ,  $\Omega^2 = 0.01$ ; Calmness:  $F_{(1, 96)} = 1.55$ ,  $p$   
 1342  $= .22$ ,  $\Omega^2 = 0.01$ ).

1343

1344 **Table S4: Descriptive statistics by treatment (Estradiol, Placebo).**

|                | Group         |               | <i>n</i> | statistic [95% CI]              | <i>p</i> |
|----------------|---------------|---------------|----------|---------------------------------|----------|
|                | Estradiol     | Placebo       |          |                                 |          |
| Age (years)    | 25.12 (3.63)  | 24.6 (3.44)   | 100      | 1381 [-0.99, 1.49] <sup>1</sup> | 0.99     |
| BMI            | 24.54 (2.65)  | 24.35 (3.08)  | 99       | 1286 [-0.99, 1.99] <sup>1</sup> | 0.99     |
| Height (cm)    | 181.90 (6.88) | 180.40 (5.95) | 99       | 1.16 [-1.07, 4.07]              | 0.94     |
| Weight (kg)    | 81.09 (9.66)  | 79.48 (11.44) | 99       | 0.76 [-2.61, 5.83]              | 0.99     |
| Visc. Fat (%)  | 6.20 (2.48)   | 6.06 (2.90)   | 98       | 1248 [-0.99, 1.00] <sup>1</sup> | 0.99     |
| Abd. Fat (%)   | 20.66 (5.97)  | 19.74 (6.32)  | 98       | 0.74 [-1.55, 3.38]              | 0.99     |
| <b>BIS/BAS</b> |               |               |          |                                 |          |
| BIS            | 17.54 (2.80)  | 18.40 (3.68)  | 100      | -1.32 [-1.86, -0.25]            | 0.88     |
| Drive          | 11.72 (1.77)  | 12.12 (2.32)  | 100      | 1074.5                          | 0.91     |
| Reward         | 11.62 (1.99)  | 12.46 (2.04)  | 100      | 921 <sup>1</sup>                | 0.18     |
| Fun Seeking    | 15.88 (2.00)  | 16.08 (2.17)  | 100      | -0.48 [-1.03, 0.63]             | 0.99     |

1345 Note: Values in cells denote M, parentheses denote SD. The superscript 1 denotes the Mann-Whitney-  
 1346 Wilcoxon *W* value. For the remaining group comparisons, two-tailed independent samples Welch *t*-tests  
 1347 were employed. In cases where *n* is not equal to *N* = 100, data was not recorded for that particular variable.  
 1348 *p*-values are Bonferroni corrected.  
 1349

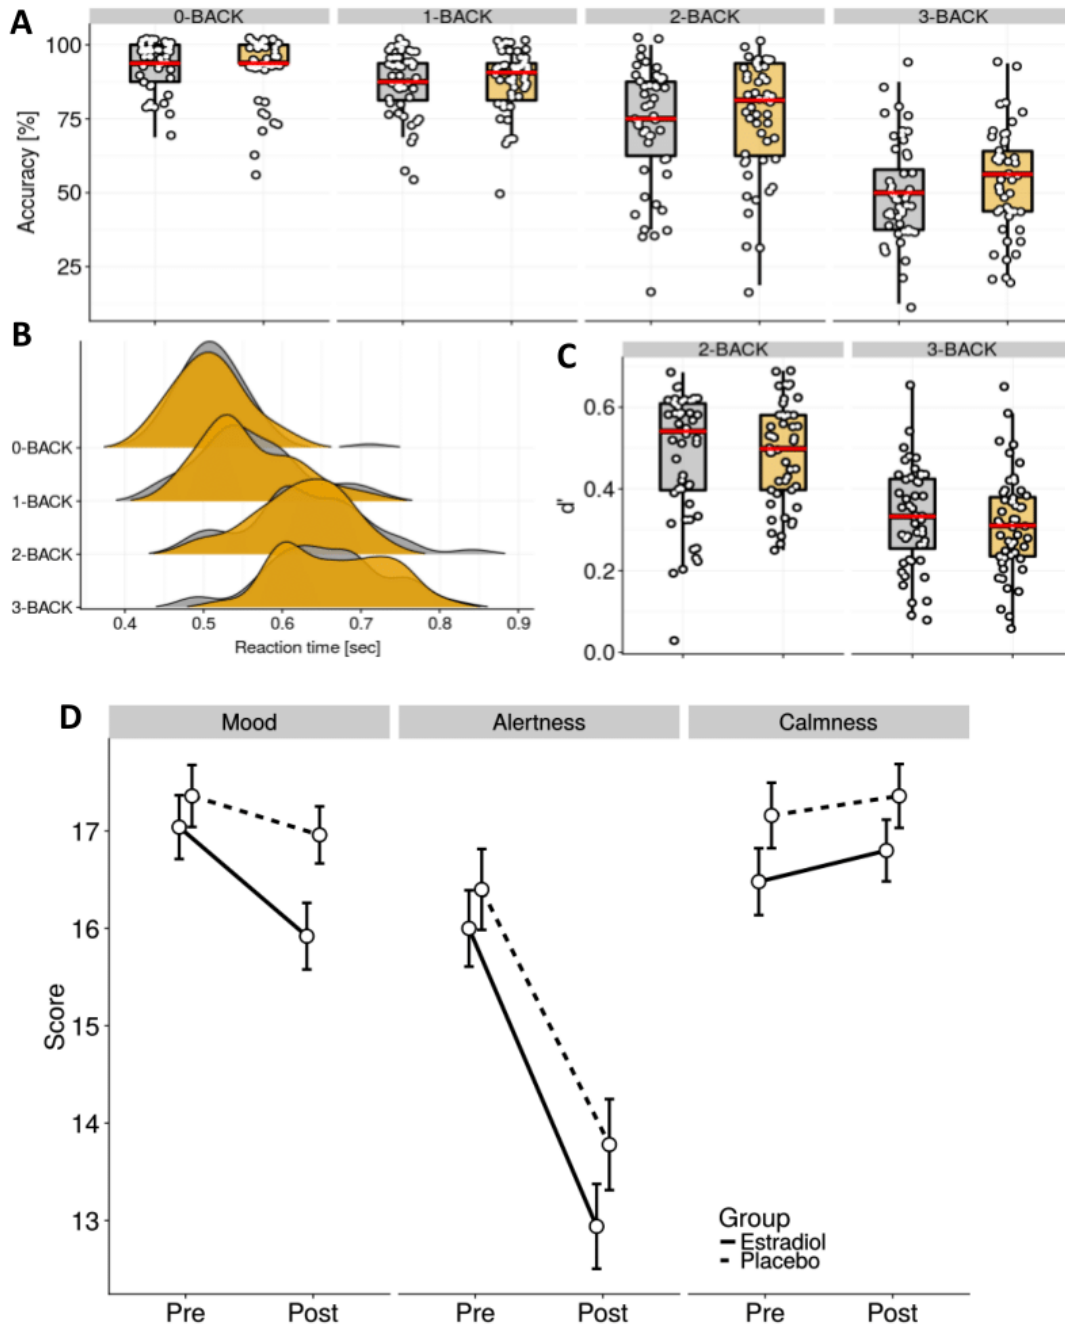

**Figure S1.** **A**) Accuracy for individual conditions. The red bar represents the median, the box plot represents the 75% middle most data points, with the whiskers representing 1.95\*IQR. Orange depicts the estradiol and gray the placebo group. That is, they represent the division of subjects according to whether they would subsequently be allocated to the estradiol or placebo group. This color convention is used throughout all figures. **B**) shows density plots for reaction time data for individual conditions. **C**) shows  $d'$  in the most difficult two conditions (2-BACK, 3-BACK) as there were no false alarms in the 0-BACK and 1-BACK, thus accuracy is reduced to  $d'$ . **D**) Average scores prior and post administration for the three subscales of the MDBF.

1350  
1351  
1352  
1353  
1354  
1355  
1356  
1357  
1358  
1359

1360

1361

1362 Furthermore, our working memory (N-BACK) task revealed a comparable  
 1363 picture for accuracy (Figure S2A), reaction times (Figure S2B), and d-prime (Figure  
 1364 S2C). That is, there was no statistically significant difference between the estradiol and  
 1365 placebo group in accuracy, average reaction times, and d-prime. We did observe an  
 1366 expected drop in performance in terms of decreased accuracy (0-BACK: 92.94 ±9.34,  
 1367 1-BACK: 88.06 ±10.78, 2-BACK: 74.25 ±19.38, 3-BACK: 51.56 ±17.37), and d-prime  
 1368 (2-BACK: 0.48 ±0.14, 3-BACK: 0.32 ±0.12), and increased reaction times (0-BACK:  
 1369 0.51 ±0.05, 1-BACK: 0.56 ±0.06, 2-BACK: 0.63 ±0.07, 3-BACK: 0.66 ±0.07) as the  
 1370 condition became more difficult (i.e. went from 0-BACK to 3-BACK). Separate linear  
 1371 models were used to compute to check for main effects of drug ( $F_{(1, 196)} = 2.01, p$   
 1372  $= .16, \Omega^2 = 0.00$ ) and an interactive effect of drug and condition on d-prime ( $F_{(1, 196)} =$   
 1373  $0.82, p = .37, \Omega^2 = 0.00$ ). As mentioned above, we also did this for accuracy (main  
 1374 effect of drug:  $F_{(1, 392)} = 1.07, p = .30, \Omega^2 = 0.00$ ; drug\*condition interaction:  $F_{(3, 392)} =$   
 1375  $2.30, p = .08, \Omega^2 = 0.00$ ), and reaction times (main effect:  $F_{(1, 347)} = 1.31, p = .25, \Omega^2 =$   
 1376  $0.00$ ; drug\*condition interaction:  $F_{(1, 347)} = 0.99, p = .39, \Omega^2 = 0.00$ ).

1377

1378 **Table S5. Descriptive statistics of MDBF and BIS-11 subscales.**

|               | N   | Pre-administration |              | Post-administration |              |
|---------------|-----|--------------------|--------------|---------------------|--------------|
|               |     | Estradiol          | Placebo      | Estradiol           | Placebo      |
| <b>MDBF</b>   |     |                    |              |                     |              |
| Mood          | 100 | 17.04 (2.31)       | 17.36 (2.25) | 15.92 (2.41)        | 16.96 (2.07) |
| Alertness     | 100 | 16.00 (2.77)       | 16.40 (2.93) | 12.94 (3.08)        | 13.78 (3.30) |
| Calmness      | 100 | 16.48 (2.43)       | 17.16 (2.38) | 16.80 (2.24)        | 17.36 (2.32) |
| <b>BIS-11</b> |     |                    |              |                     |              |
| General       | 100 | 57.86 (7.68)       | 59.28 (7.45) | 59.96 (8.51)        | 60.46 (7.86) |
| Motor         | 100 | 20.76 (3.00)       | 21.78 (3.42) | 22.02 (3.42)        | 22.42 (3.65) |
| Attention     | 100 | 14.34 (3.37)       | 14.14 (2.17) | 15.10 (3.30)        | 14.64 (2.68) |
| Nonplanning   | 100 | 22.76 (3.61)       | 23.36 (4.29) | 22.84 (4.05)        | 23.40 (4.21) |

1379 Note: values in cells denote *M*, values in parentheses denote *SD*.

1380

1381 In summary, both groups were matched on working memory and post-  
 1382 administration mood scores. They were additionally matched for age, height, visceral  
 1383 and abdominal fat, BMI, BIS-BAS, and impulsivity (BIS-11). The estradiol group had

1384 higher estradiol concentrations after but not before administration compared to the  
1385 placebo group. Importantly, there was no correlation between subjects' belief about  
1386 whether they had received estradiol or placebo and actually receiving estradiol ( $r = 0.02$ ,  
1387  $p = .82$ ), the certainty of that belief and actually receiving estradiol ( $r = 0.02$ ,  $p = .82$ ),  
1388 or between the reported observed changes and actually receiving estradiol ( $r = -0.08$ ,  
1389  $p = .42$ ). This shows that our double-blind procedure worked and that our placebo gel  
1390 preparation was indistinguishable from the actual drug. Overall, the described results  
1391 show that our administration procedure was successful and both groups were matched  
1392 on key traits that could have potentially impacted the observed behaviour. This allowed  
1393 us to constrain the number of possible alternative explanations of our main results.

1394

1395 **Table S6. Frequencies of individual polymorphisms of DAT and COMT genes.**

| Polymorphism | Group     | N  |
|--------------|-----------|----|
| 9/10         | Estradiol | 18 |
| 9/10         | Placebo   | 16 |
| 10/10        | Estradiol | 21 |
| 10/10        | Placebo   | 26 |
| Val/Val      | Estradiol | 11 |
| Val/Val      | Placebo   | 9  |
| Met/Val      | Estradiol | 23 |
| Met/Val      | Placebo   | 26 |
| Met/Met      | Estradiol | 12 |
| Met/Met      | Placebo   | 15 |

1396 Note: the split according to both COMT and DAT does not sum to 100 because for a few subjects it was  
1397 not possible to determine their polymorphism.

1398

## 1399 **Reinforcement learning task**

### 1400 **Selecting linear models**

1401 For all general linear models assessing interactions described in our results, we started  
1402 with the simplest model which included our interaction of interest (either drug\*COMT or  
1403 drug\*DAT) and regressed out the belief of having received the drug. We considered

1404 this belief as a nuisance regressor because of our previous work showing the impact of  
1405 beliefs about a hormone on subsequent behaviour<sup>59</sup>. Additional nuisance regressors  
1406 included bodily measures known to impact estradiol metabolism which we collected:  
1407 weight, BMI, abdominal and visceral fat<sup>60,61</sup> and post-administration cortisol levels<sup>58</sup>.  
1408 All linear models were compared with BIC and AIC. Unless stated otherwise in the main  
1409 text, for all reported results the winning model regressed out cortisol levels following  
1410 administration, beliefs about having received the drug, the certainty of that belief and  
1411 whether they had observed any changes in themselves, a composite score of weight  
1412 and BMI (main text), visceral, and abdominal fat. For general linear models involving  
1413 accuracy, we also regressed out reaction times to control for accuracy-speed trade-  
1414 offs. All nuisance regressors were z-scored.  
1415

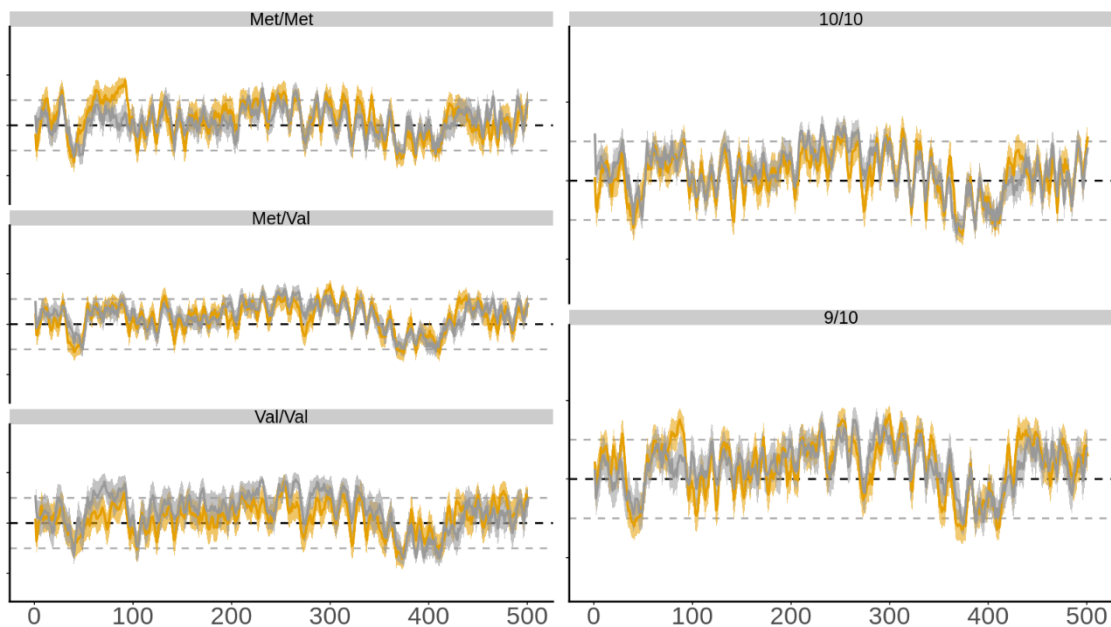

1416

1417 **Figure S2.** Relative choice probability for choosing option A (top of y-axis) vs. choosing stimulus 1 (bottom  
1418 of y-axis) for the placebo (gray) and estradiol (orange) group split according to both polymorphisms  
1419 assessed in the main text: COMT (left panel), DAT (right panel) across trials (1-500). Thick lines represent  
1420 trial means, shaded areas denote standard error of the means. The blue line in the background denotes  
1421 the empirical relative reward probability which was computed from the probability of stimulus two being  
1422 rewarding (top of y-axis) - stimulus one being rewarding (bottom of y-axis). Gray dotted lines represent  
1423 where participants were on average 25% more likely to select option A (upper line) or stimulus 1 (lower  
1424 line). All time-series traces are smoothed with a 5-trial moving average for visual purposes.  
1425

1426 Figure S2 reveals a differential effect of estradiol administration on choice  
1427 behaviour that depends on polymorphisms of both COMT and DAT. In the case of the  
1428 COMT polymorphism this is most clearly visible in the lower left panel. The panel shows  
1429 that placebo Val/Val subjects exhibited a clear tendency towards stimulus two until trial  
1430 ~370. After this, they did not reverse back towards choosing it more often despite  
1431 stimulus two being more rewarding from trial ~420 onwards. This is in contrast with  
1432 results for subjects with other polymorphisms of COMT and results when subjects were  
1433 split according to the DAT1 polymorphism. Estradiol Met/Met subjects exhibited choice  
1434 behaviour more aligned with the reward probability distribution in the beginning at trial  
1435 ~80 compared to subjects from the placebo group with the same polymorphism. When  
1436 we then split subjects according DAT1 polymorphism, the estradiol 9/10 subjects can  
1437 similarly be seen following the reward probability distribution more closely compared to  
1438 the placebo 9/10.

1439

#### 1440 Model prediction for switching behaviour

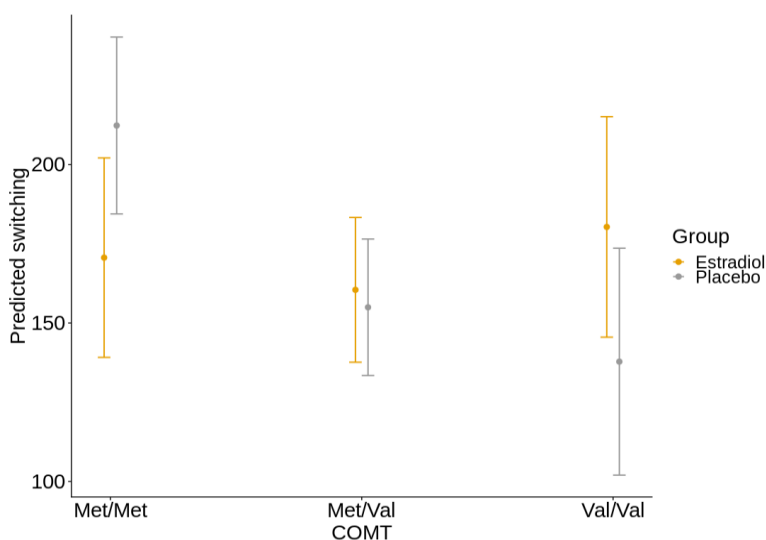

1441

1442 **Figure S3.** General linear model prediction for switching behaviour (i.e. a change in chosen stimulus on  
1443 trial  $t + 1$  from trial  $t$ , independent of choice outcome on trial  $t$ ). Estradiol administration dampened naturally  
1444 occurring differences in switching behaviour when subjects were split according to the COMT  
1445 polymorphism, i.e. whether subjects would switch the stimulus they chose on trial  $t$  compared to trial  $t + 1$   
1446 irrespective of choice outcome on trial  $t$ . Figure S3 shows that our linear model made comparable  
1447 predictions about this switching behaviour for all three polymorphisms in the estradiol group. In contrast, in  
1448 the placebo group it predicted a clear linear decrease in switching from the Met/Met genotype (i.e. high  
1449 prefrontal dopamine) towards the Val/Val genotype (i.e. low prefrontal dopamine).

1450

1451 **The role of CYP 19A1, ER $\alpha$ , ER $\beta$ , CAG, and GGN**

1452 Because the results we report in the main text and the supplementary materials have  
1453 other mechanistic explanations and/or could have been moderated through other  
1454 candidate mechanisms, we further analyzed these mechanisms together by providing  
1455 theoretical motivation for these analyses. We analyzed the candidate mechanisms for  
1456 both accuracy and reported switching behaviour. Here, we first briefly outline their  
1457 importance and then summarize the observed results.

1458 It is known that androgens are converted to estrogen<sup>74</sup>. This means that the  
1459 increase in estrogen levels arises from the conversion process and the administration  
1460 more directly. Furthermore, variation in the length of two functional polymorphisms  
1461 (CAG – polyglutamine, and GGN – polyglycine) are known to modulate the functioning  
1462 of the androgen receptor gene<sup>75</sup>. This is important for two reasons. The first is that our  
1463 procedure has previously shown to increase circulating testosterone levels which could  
1464 have raised estradiol levels whilst being moderated by subjects' androgen receptor  
1465 characteristics<sup>34</sup>. Following from this, previous work has shown that brain regions  
1466 important for memory and learning contain androgen receptors<sup>76</sup>. Therefore, it could  
1467 be possible that interindividual differences in both functional polymorphisms could have  
1468 moderated our observed results due to interindividual variability. For example, greater  
1469 CAG repeat length has previously been associated with lower scores in different  
1470 cognitive tests in older men<sup>75</sup>. Similarly, there has been an association between GGN  
1471 repeats and immediate and delayed logical memory recall as a function of GGN repeat  
1472 length found in women<sup>77</sup>. Furthermore, longer repeats of both the CAG and GGN  
1473 polymorphism have been previously associated with different disorders including  
1474 attentional deficit and hyperactivity disorder, conduct disorder, and oppositional defiant  
1475 disorder<sup>78</sup>. All described results show a correlation between interindividual variability in  
1476 androgen receptor functioning and cognitive performance, giving rise to the CAG and  
1477 GGN polymorphisms being potential candidate mechanisms moderating the observed  
1478 effect of estradiol on accuracy and switching behaviour. Repeat polymorphism of two

1479 most studied functional polymorphisms in the androgen receptor gene - CAG and GGN  
1480 - were therefore examined.

1481 Throughout the conversion process from androgens to estrogens, the CYP19A1  
1482 gene encodes instructions for aromatase – the enzyme converting androgens to  
1483 estrogens <sup>79</sup>. The single nucleotide polymorphisms (SNPs) associated with the  
1484 CYP19A1 gene regulate the metabolism of androgens and mediate brain estrogen  
1485 activity. Two specific SNPs (rs700518, rs936306) have been previously shown to have  
1486 a role in cognitive functioning in humans. For example, men with the homozygous AA  
1487 allele have been shown to have higher estradiol serum levels and greater bilateral  
1488 posterior hippocampal gray matter volume compared to those homozygous with the GG  
1489 allele <sup>80</sup>. While other work has shown a differential impact of homozygous CC alleles  
1490 versus homozygous TT alleles on episodic memory recall in women <sup>81</sup>. Given that our  
1491 procedure has previously shown to increase circulating testosterone levels and that  
1492 polymorphisms of the CYP19A1 gene are known to have a role in cognitive functioning,  
1493 we aimed to exclude the possibility of that driving our observed effects and analyzed  
1494 both single nucleotide polymorphisms of the CYP19A1 gene.

1495 Once androgens are converted to estrogens, estrogen action is mediated  
1496 through the known estrogen receptors (ER $\alpha$ , ER $\beta$ ). Both receptors are widely  
1497 distributed throughout the brain in regions important for cognitive functioning. So far, it  
1498 has been shown that ER $\alpha$  is responsible for most of estrogen-related activation. For  
1499 example, it has been shown that SNPs of ER $\alpha$  are related to Alzheimer's disease and  
1500 are associated with the likelihood of developing cognitive impairment <sup>82</sup>. We have,  
1501 therefore, focussed on two particular SNPs of ER $\alpha$ : rs9340799, rs2234693. In contrast,  
1502 little is known of a potential impact of ER $\beta$ . As an exploratory measure, we have  
1503 included repeats of this receptor in our analysis as well.

1504 Of the described candidates (CAG, GGN, CYP 19A1, ER $\alpha$ , ER $\beta$ ), no test  
1505 revealed any effect of interest. There was no interaction between group membership  
1506 (i.e. estradiol or placebo) and either the SNPs of ER $\alpha$ : rs9340799 ( $F_{(2, 84)} = 0.66$ ,  $p =$



1507 .52), rs2234693 ( $F_{(2, 84)} = 0.63$ ,  $p = .53$ ) in relation to accuracy. Furthermore, the same  
1508 was true for the interaction between CAG repeats and group membership ( $F_{(1, 87)} = 0.45$ ,  
1509  $p = .51$ ), GGN repeats and group membership ( $F_{(1, 87)} = 1.31$ ,  $p = .26$ ), and SNPs of the  
1510 CYP19A1 gene and group membership (rs700518  $F_{(2, 84)} = 1.84$ ,  $p = .15$ , rs936306  $F_{(2,$   
1511  $84)} = 0.34$ ,  $p = .72$ ). In a final examination, we also looked at the repeats of ER $\beta$  to  
1512 determine whether this could have driven any of the observed effects. However, this  
1513 was not the case for either recorded variant of ER $\beta$  (ER $\beta$ 1:  $F_{(1, 87)} = 0.02$ ,  $p = .89$ , ER $\beta$ 2:  
1514  $F_{(1, 87)} = 0.00$ ,  $p = .96$ ).

1515 Identical results were obtained for switching behaviour. While we observed a  
1516 statistically significant interaction between estradiol administration and the COMT  
1517 polymorphism, this was not true for any of the other mechanistic explanations. That is,  
1518 no model showed an interaction between group membership and either of the SNPs of  
1519 ER $\alpha$ : rs9340799 ( $F_{(2, 84)} = 2.90$ ,  $p = .06$ ), rs2234693 ( $F_{(2, 84)} = 2.88$ ,  $p = .06$ ), CAG repeats  
1520 ( $F_{(1, 87)} = 0.10$ ,  $p = .76$ ), GGN repeats  $F_{(1, 87)} = 1.32$ ,  $p = .25$ ), and SNPs of the CYP19A1  
1521 gene (rs700518  $F_{(2, 84)} = 1.81$ ,  $p = .17$ , rs936306  $F_{(2, 84)} = 1.08$ ,  $p = .35$ ) in relation to  
1522 switching behaviour. As in the case of accuracy, we also looked at the repeats of ER $\beta$ .  
1523 Again, there was no statistically significant contribution to switching behaviour from this  
1524 predictor for either recorded variant of ER $\beta$  (ER $\beta$ 1:  $F_{(1, 87)} = 3.05$ ,  $p = .08$ ; ER $\beta$ 2:  $F_{(1, 87)}$   
1525  $= 0.96$ ,  $p = .33$ ).

1526 We finally repeated the set of analyses for staying behaviour with no effects  
1527 found. SNPs of ER $\alpha$ : rs9340799 ( $F_{(2, 84)} = 1.69$ ,  $p = .19$ ), rs2234693 ( $F_{(2, 84)} = 1.79$ ,  $p =$   
1528  $.17$ ), CAG repeats ( $F_{(1, 87)} = 0.38$ ,  $p = .54$ ), GGN repeats  $F_{(1, 87)} = 0.30$ ,  $p = .59$ ), SNPs  
1529 of the CYP19A1 gene (rs700518  $F_{(2, 84)} = 1.27$ ,  $p = .29$ , rs936306  $F_{(2, 84)} = 0.59$ ,  $p = .55$ ),  
1530 and variant of ER $\beta$  (ER $\beta$ 1:  $F_{(1, 87)} = 1.35$ ,  $p = .25$ ; ER $\beta$ 2:  $F_{(1, 87)} = 0.86$ ,  $p = .36$ ).

1531 In brief, we have shown that the effects did not depend on overall androgen  
1532 receptor functioning assessed by investigating the repeat length of two different  
1533 functional polymorphisms (CAG and GGN). Both polymorphisms were investigated due

1534 to the known conversion process of androgens to estrogen which could have  
1535 moderated these results <sup>74,80</sup>. We excluded that interindividual variability in the  
1536 conversion process itself would predict the observed effects, by investigating two  
1537 polymorphisms of the CYP19A1 gene which plays a key role in converting androgens  
1538 to estrogens <sup>80,81</sup>. Finally, we excluded the possibility that following the conversion  
1539 process, the observed effects were a consequence of polymorphisms (ER $\alpha$ ) or repeats  
1540 (ER $\beta$ ) of known estrogen receptors, given that both are widely distributed throughout  
1541 the brain, especially in regions of importance for reward processing <sup>83</sup>. All of the  
1542 described candidates revealed no effect for either accuracy or switching behaviour that  
1543 are reported above.

1544

#### 1545 **Impact of previous choice on current choice**

1546 Since we observed a difference in group choice behaviour in Figure S2 in the main  
1547 results, and that the estradiol and placebo group systematically chose differently on  
1548 7.5% of the trials, we ran separate logistic regressions to compute whether this would  
1549 also be observed in how past choices would affect the current choice. We predicted  
1550 there would be a difference between the estradiol and placebo group in pure choice  
1551 autocorrelation (i.e. if I choose option A on trial  $t$ , is it more likely I will choose it again  
1552 on trial  $t + 1$ ) and reward-related autocorrelation (i.e. if I choose option A on trial  $t$  and  
1553 it is rewarded, is it more likely I will choose it again on trial  $t + 1$ ). We further predicted  
1554 that splitting these two groups according to the DAT1 and COMT polymorphism would  
1555 show differences depending on the polymorphism.

1556 Information about subjects' choices  $n$  trials ago was varied from 1 trial to 7 trials  
1557 ago and used as a regressor to predict current choice. Therefore, in the design matrix  
1558 we had information about their choice from 7 trials to 1 trial ago. The value 1 meant  
1559 they repeated their choice, while 0 meant they did not. We first split participants  
1560 according to the estradiol and placebo group (Figure S4).

1561

1562

1563

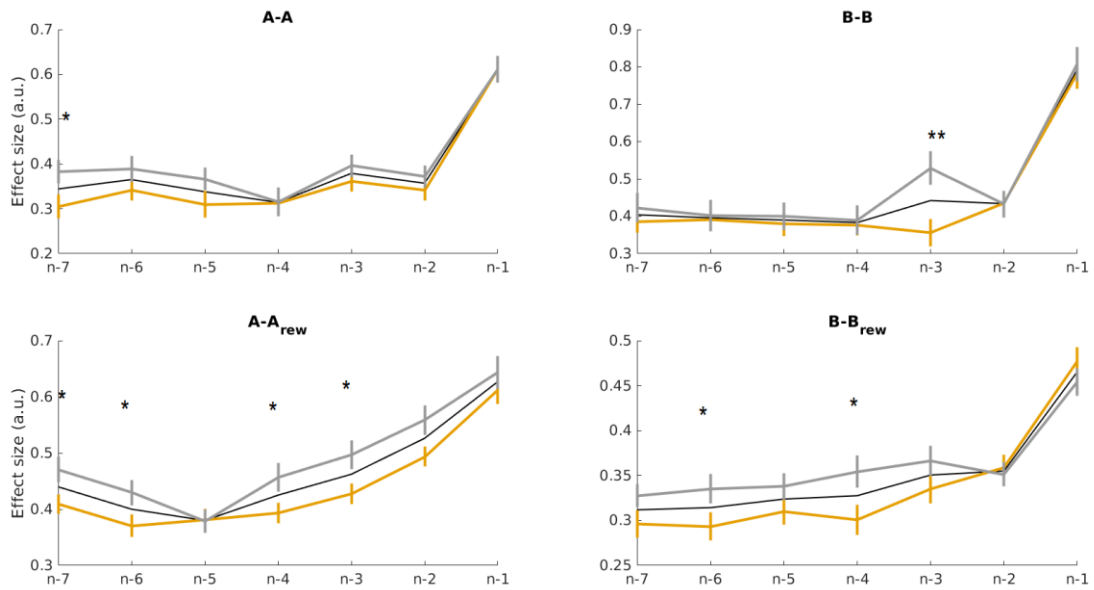

1564

1565 **Figure S4.** The top panels show pure choice autocorrelation: Choosing A if A was chosen previously or  
1566 choosing B if B was chosen previously. Bottom panels show reward-related choice autocorrelation:  
1567 Choosing A if A was previously rewarded or choosing B if B was previously rewarded. The lines show the  
1568 averaged beta coefficient from the regression. Error bars are standard errors of the mean. Orange line  
1569 depicts the estradiol group, gray lines depict the placebo group. \*  $p < .05$ , \*\*  $p < .01$ .

1570

1571

1572

1573

1574

1575

1576

1577

1578

1579

1580

1581

1582

1583

Contrary to our prediction, the top panel in Figure S4 does not reveal a systematic difference in choice autocorrelation between the estradiol and placebo group. One notable exception is the contribution of the choices made three trials ago where the placebo group was more likely to consider those choices compared to the estradiol group ( $p < .01$ ). However, the bottom panel reveals that the estradiol group had lower reward-related autocorrelation for both options. That is, if they were rewarded for a choice several trials ago, they were less likely to persevere with that choice compared to the placebo group. This is consistent with Figure 2A where the estradiol group followed the reward probability distribution better compared to the placebo group. Figure S4 reveals why that may have been the case; they were less likely to persevere due to information received several trials ago, but not the one that just occurred  $t - 1$  trials ago.

1584 We then further split the same participants according to the COMT (Figure S5)  
 1585 DAT (Figure S6) polymorphisms. We see that the autocorrelation difference for  
 1586 choosing option B three trials ago reported in Figure S4 was driven by the group with  
 1587 the Val/Met genotype specifically. In contrast, the difference between the estradiol and  
 1588 placebo group in terms of reward-related choice autocorrelation was driven by the  
 1589 placebo group with the Val/Val genotype (i.e. low prefrontal dopamine), as seen in the  
 1590 third column. Only in the Val/Val comparison was there a systematic difference between  
 1591 the estradiol and placebo subgroup. This difference disappeared in the other COMT  
 1592 polymorphisms and was also only true for option A. Conversely, in column four a  
 1593 difference between the estradiol and placebo group only became observable in subjects  
 1594 with the Met/Met genotype (i.e. high prefrontal dopamine).  
 1595

1595

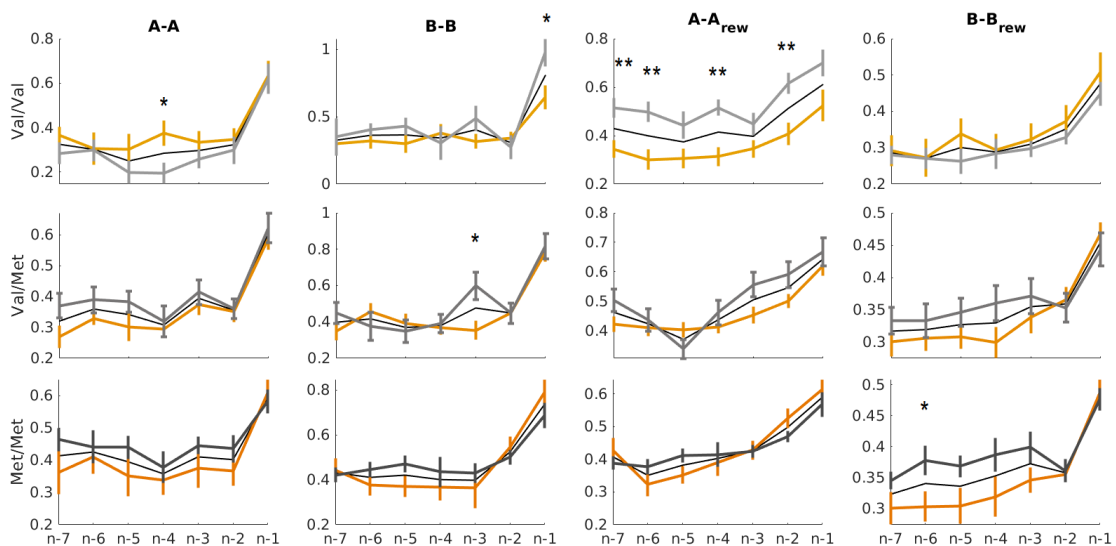

1596

1597 **Figure S5.** Individual columns show the same as individual panels in Figure S4. Here, they are additionally  
 1598 split according to the COMT polymorphism. The lines show the averaged beta coefficient from the  
 1599 regression. Error bars are standard errors of the mean. Orange line depicts the estradiol group, gray lines  
 1600 depict the placebo group. \* $p < .05$ , \*\* $p < .01$ .  
 1601  
 1602

1603 The final split was according to the DAT1 polymorphism. This did not reveal  
 1604 clearly interpretable systematic differences apart from the autocorrelation difference for  
 1605 option B between the estradiol and placebo group being driven by subjects with the  
 1606 10/10 genotype (i.e. low striatal dopamine) as opposed to subjects with the 9/10

1607 genotype. Similarly, estradiol 10/10 genotype subjects also exhibited lower reward-  
1608 related autocorrelation compared to the placebo 10/10 genotype subjects. However,  
1609 this was also present in the 9/10 subjects for both stimuli, indicative of them being more  
1610 likely to stick with identical choices after being rewarded.

1611

1612

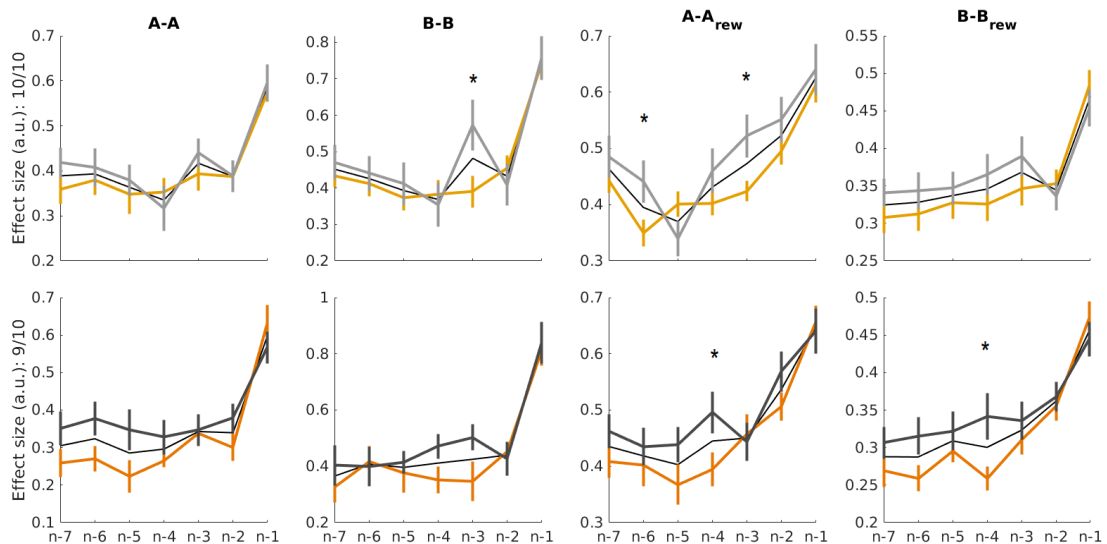

1613

1614

1615

1616

**Figure S6.** Individual columns show the same as individual panels in Figure S4. Here, they are split according to the VNTR polymorphism of the DAT gene. \*  $p < .05$ , \*\*  $p < .01$ .

1617

### 1618 Generalized linear mixed effects model predictions for choice

1619 Figure S7 reveals strong interactive effects for both the DAT polymorphism with drug  
1620 over time on choice (A) and the COMT polymorphism (B) with the same model  
1621 structure. We did not include models that would combine both genotypes as they would  
1622 have given rise to an insufficient size per smallest cell (Table S6).

1623

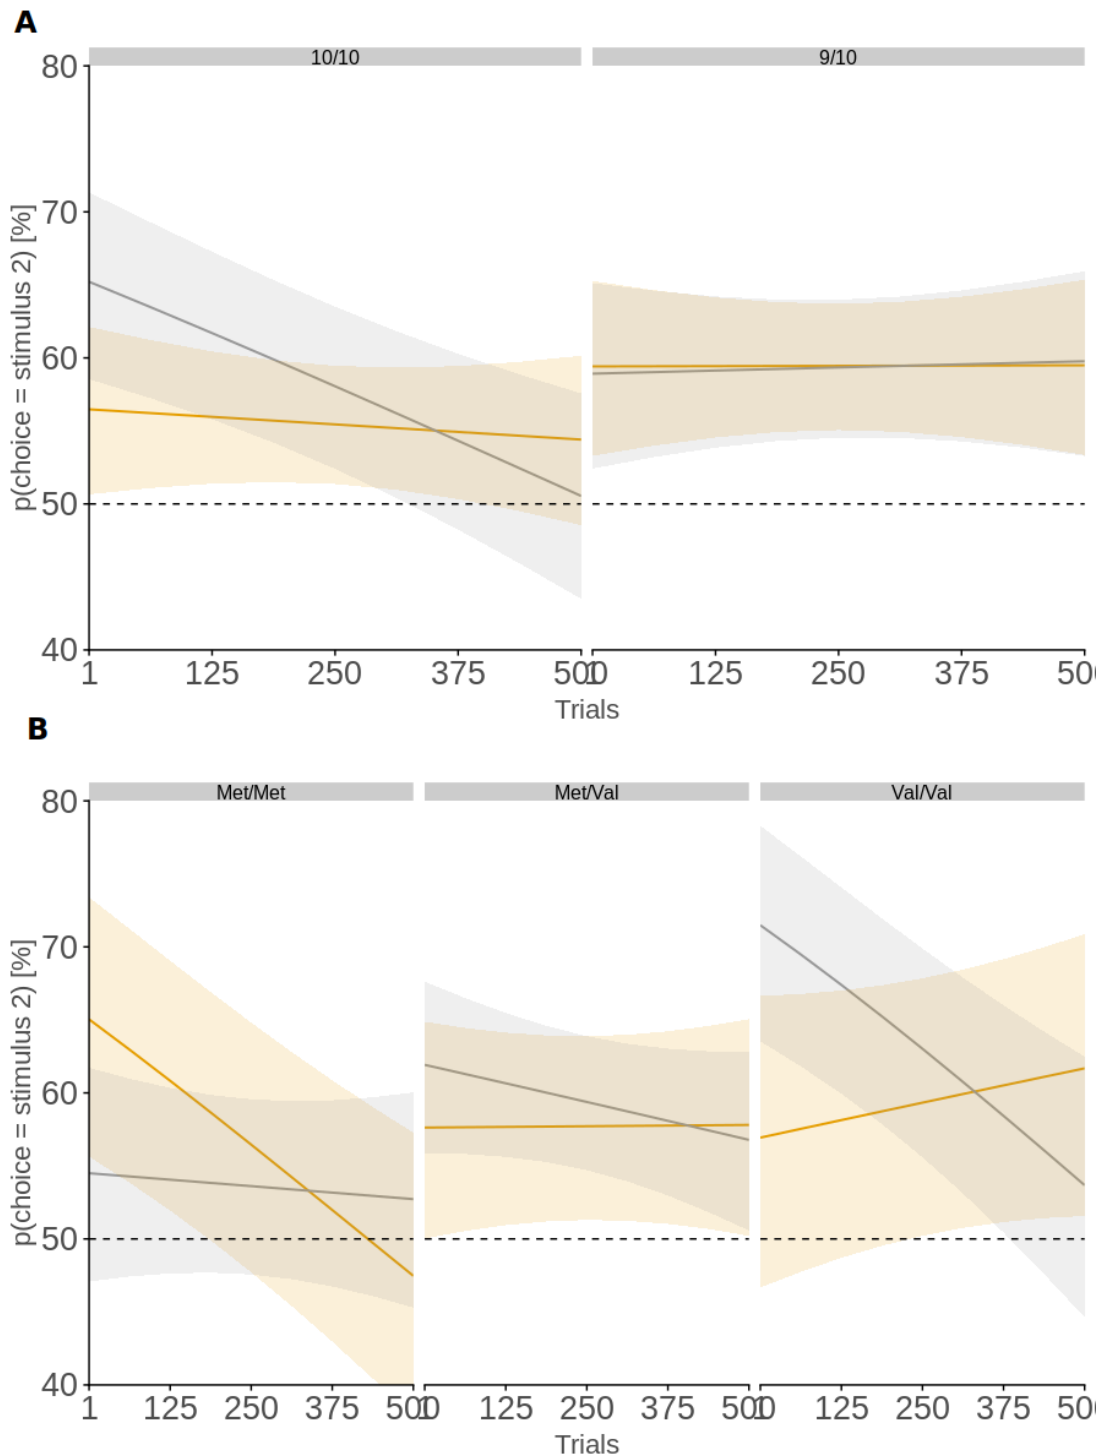

**Figure S7.** Predictions from winning models of the generalized linear mixed effects models for **A)** the interaction between drug, DAT, and trial on choice, and **B)** the interaction between drug, COMT, and trial on choice.

1624  
1625  
1626  
1627  
1628

### 1629 **Formal model comparison**

1630 In addition to computing the leave-one-out information criterion to perform model  
1631 comparison<sup>71</sup> we similarly computed the exceedance probability of the winning model  
1632 using the VBA toolbox<sup>73</sup>. This value showed a strong preference for the winning model

1633  $P(\text{model two}) = 98\%$ . Furthermore, we computed protected exceedance probability <sup>72</sup>  
1634 as an extension which, while yielding an expected decrease in the winning model  
1635 probability, still favoured model two over other competing models ( $P(\text{model two}) =$   
1636  $12.5\%$ ). The likely decrease was due to the reinforcement learning task not being  
1637 optimized to detect behavioural differences between the models tested. However, in all  
1638 reported models, the latent variable of interest, i.e. the learning rate, remained  
1639 unaltered. We would therefore expect the increase in learning rates to be present if we  
1640 were to select the learning rates from models that best fit individual subjects.

1641

### 1642 **Validating model**

1643 We further tested the model validity and predictions by computing posterior predictive  
1644 densities, i.e. what predictions does the model make on a trial by trial basis for subjects  
1645 with the parameters such as those that were extracted from our participants. Posterior  
1646 predictive densities showed no difference in a fit between both the estradiol and placebo  
1647 group and approximated the empirical reward probability distribution (Figure S8A). To  
1648 quantify this, we then compared model predictions from posterior predictive densities  
1649 with actual participant behaviour to assess model accuracy collapsed across time  
1650 (Figure 4B) showing it performed above chance and equally well for both groups. We  
1651 further compared accuracy on each trial across participants to ensure that there were  
1652 no unexpected drops in accuracy. This did not happen as the model (Figure S8C) had  
1653 no discernible drops in performance.

1654

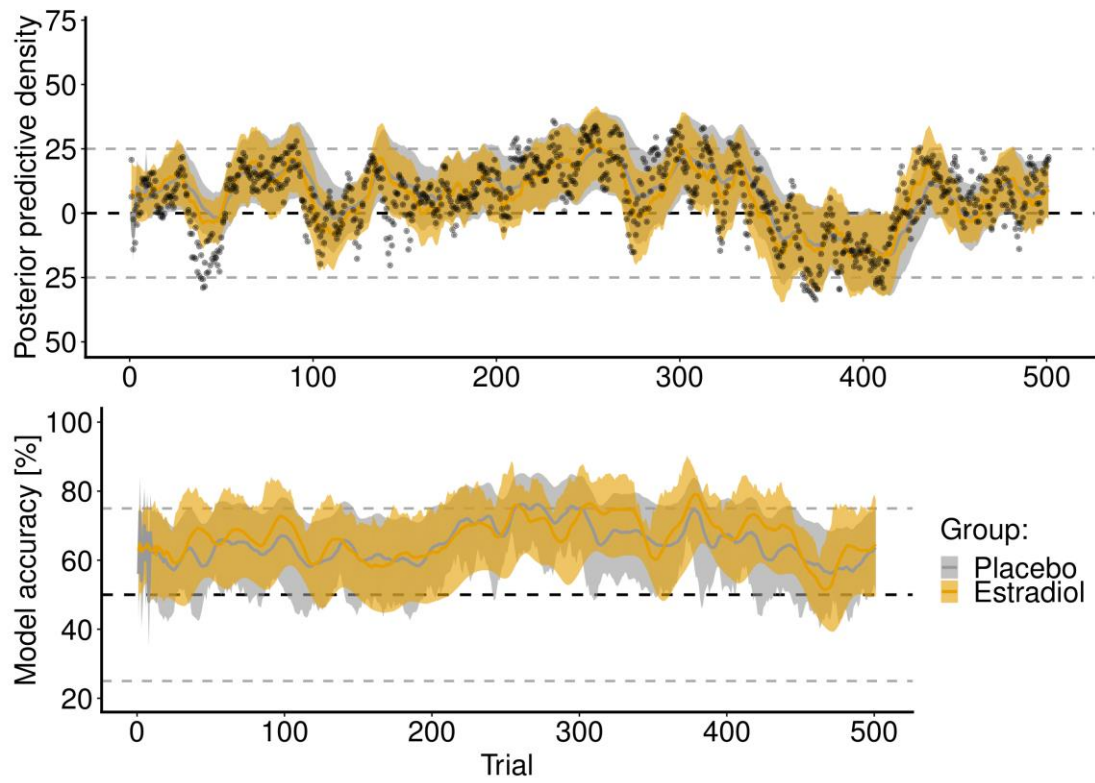

1655

1656

1657

1658

**Figure S8.** A) Posterior predictive density computed for both groups with overlaid average responses for both groups across trials B) Accuracy for both groups obtained from the posterior predictive density for both groups separately.
